# Supplementary material
Source: PubMed Central journal article supplement (PMC3989899)
Supplement: NIHMS564339-supplement-Supplementary_Material.pdf [file NIHMS564339-supplement-Supplementary_Material.pdf]

## Supplemental Information

### Supplementary methods

#### Liquid chromatography/Mass spectrometry

NanoLC-MS/MS was performed using a nanoACQUITY ultra performance liquid chromatography (UPLC®) system (Waters, Milford, MA, USA) coupled to a maXis 4G Q-TOF mass spectrometer (BrukerDaltonics, Bremen, Germany). The system was fully controlled by HyStar 3.2 (BrukerDaltonics). The UPLC system was equipped with a Symmetry C18 precolumn (20 x 0.18 mm, 5 µm particle size, Waters, Milford, USA) and an ACQUITY UPLC® BEH130 C18 separation column (75 µm × 200 mm, 1.7 µm particle size, Waters). The solvent system consisted of 0.1 % formic acid in water (solvent A) and 0.1 % formic acid in acetonitrile (solvent B). 3 µL of each sample was injected. Peptides were trapped during 1 min at 15 µL/min with 99 % A and 1 % B. Elution was performed at 60 °C at a flow rate of 450 nL/min, using a linear gradient of 6-35 % B over 28 minutes. The mass spectrometer was operating in positive mode, with the following settings: source temperature was set to 160°C while dry gas flow was at 5 liter per minute. The nanoelectrospray voltage was optimized to -5000 V. External mass calibration of the TOF was achieved before each set of analyses using Tuning Mix (Agilent Technologies, Paolo Alto, USA) in the mass range of 322-2722 m/z. Mass correction was achieved by recalibration of acquired spectra to the applied lock masses (methylstearate ( $[M+H]^+$  299.2945 m/z) and hexakis(2,2,3,3,-tetrafluoropropoxy) phosphazine ( $[M+H]^+$  922.0098 m/z)). For tandem MS experiments, the system was operated with automatic switching between MS and MS/MS modes in the range of 100-2500 m/z (MS acquisition time of 0.4 s, MS/MS acquisition time between 0.05 s (intensity > 250000) and 1.25 s (intensity <5000)). The 6 most abundant ions (absolute intensity threshold of 1500, were selected from each MS spectrum for further isolation and CID fragmentation using nitrogen as collision gas. Ions were excluded after acquisition of one MS/MS spectrum and the exclusion was released after 0.2 minutes.

## **MS/MS data interpretation**

The peak list has been searched against a Swiss Prot-derived combined target-decoy database created 2012-07-18, containing 7901 target sequences plus the same number of reversed decoy sequences) using Mascot (version 2.4.1, Matrix science, London, England). The database contained sequences of human proteins including common contaminants (human keratins and porcine trypsin) and was created using an in-house database generation toolbox (<http://msda.u-strasbg.fr>). During database search, up to one missed cleavage by trypsin and three variable modifications (oxidation of Methionine (+16 Da), carbamidomethylation of Cysteine (+57 Da) and acetylation n-ter (+42 Da), were considered. The search window was set to 10 ppm for precursor ions and 0.02 Da for fragment ions. Mascot result files (.dat) were imported into Scaffold 3 software (version 3.6.5; Proteome Software Inc., Portland, OR, USA) and filtering criteria based on probability-based scoring of the identified peptides were taken into account: peptide having an ion score > minus identity score above -40 and a Mascot Ion score > 25 were validated. The false discovery rate (FDR) was calculated to be <1 % based on the number of decoy hits.

## Supplemental Tables

**Table S1: Yeast strains used in this study.**

| Name                                | Genotype                                                                                                         | Ref                  |
|-------------------------------------|------------------------------------------------------------------------------------------------------------------|----------------------|
| Y131                                | MATa ura3-1 trp1-1 leu2-3_112 his3-11_15 ade2-1 can1-100 <i>hta1-htb1::LEU2 hta2-htb2::URA3 pRS426-HTA1-HTB1</i> | (Robzyk et al. 2000) |
| Y133                                | isogenic to Y131, <i>pRS426-hta1-htb1-K123R</i>                                                                  | (Robzyk et al. 2000) |
| Y131 Prp42-HA                       | isogenic to Y131, <i>PRP42-HA-HIS</i>                                                                            | This study           |
| Y133 Prp42-HA                       | isogenic to Y133, <i>PRP42-HA-HIS</i>                                                                            | This study           |
| Y131 Lea1-HA                        | isogenic to Y131, <i>LEA1-HA-HIS</i>                                                                             | This study           |
| Y133 Lea1-HA                        | isogenic to Y133, <i>LEA1-HA-HIS</i>                                                                             | This study           |
| Y131 Cbc2-TAP                       | isogenic to Y131, <i>CBC2-TAP-TRP</i>                                                                            | This study           |
| Y133 Cbc2-TAP                       | isogenic to Y133, <i>CBC2-TAP-TRP</i>                                                                            | This study           |
| Y131 Cbc2-TAP Prp42-HA              | isogenic to Y131, <i>CBC2-TAP-TRP, PRP42-HA-HIS</i>                                                              | This study           |
| Y133 Cbc2-TAP Prp42-HA              | isogenic to Y133, <i>CBC2-TAP-TRP, PRP42-HA-HIS</i>                                                              | This study           |
| Y131 Cbc2-TAP Lea1-HA               | isogenic to Y131, <i>CBC2-TAP-TRP, LEA1-HA-HIS</i>                                                               | This study           |
| Y133 Cbc2-TAP Lea1-HA               | isogenic to Y133, <i>CBC2-TAP-TRP, LEA1-HA-HIS</i>                                                               | This study           |
| W303                                | MATa ura3-52 trp1D2 leu2-3_112 his3-11 ade2-1 can1-100                                                           |                      |
| W303 <i>set1Δ</i>                   | isogenic to W303, <i>set1::KANMX</i>                                                                             | This study           |
| W303 <i>set2Δ</i>                   | isogenic to W303, <i>set2::KANMX</i>                                                                             | This study           |
| W303 <i>bre1Δ</i>                   | isogenic to W303, <i>bre1::KANMX</i>                                                                             | This study           |
| W303 Prp42-HA                       | isogenic to W303, <i>PRP42-HA-HIS</i>                                                                            | This study           |
| W303 <i>set1Δ</i> Prp42-HA          | isogenic to W303, <i>set1::KANMX, PRP42-HA-HIS</i>                                                               | This study           |
| W303 <i>set2Δ</i> Prp42-HA          | isogenic to W303, <i>set2::KANMX, PRP42-HA-HIS</i>                                                               | This study           |
| W303 <i>dot1Δ</i> Prp42-HA          | isogenic to W303, <i>dot1::KANMX, PRP42-HA-HIS</i>                                                               | This study           |
| W303 Cbc2-TAP Prp42-HA              | isogenic to W303, <i>CBC2-TAP-TRP, PRP42-HA-HIS</i>                                                              | This study           |
| W303 <i>set1Δ</i> Cbc2-TAP Prp42-HA | isogenic to W303, <i>set1::KANMX, CBC2-TAP-TRP, PRP42-HA-HIS</i>                                                 | This study           |

**Table S2: Oligonucleotides used in this study.**

| <b>Name</b>      | <b>Sequences</b>           | <b>Ref</b>                      |
|------------------|----------------------------|---------------------------------|
| RPS21B5'UTRf s1  | CGAATCTCGGCTCTGTATAATG     | (Kress et al. 2008)             |
| RPS21Bexon1r s1  | CCATTTTGGCTTATTGATATTCTTTT | (Kress et al. 2008)             |
| RPS21BIntronF3s2 | TCCGAATTAGTGGGTTTCCA       | (Kress et al. 2008)             |
| RPS21BIntronR3s2 | TCAATGTTAGTACATTTGCGCTTA   | (Kress et al. 2008)             |
| RPS21BIntronF1s3 | AATCATCAAAGCCGATGACC       | (Kress et al. 2008)             |
| RPS21BIntronR1s3 | CATCGGATTCACCTCTGGAT       | (Kress et al. 2008)             |
| RPS21bExon2-2s4  | ATCCAGAGGTGAATCCGATG       | (Kress et al. 2008)             |
| RPS21b3'UTR-2s4  | AACGACTTCCCCTCTTCTTTTT     | (Kress et al. 2008)             |
| HNT1 5' s1 F     | GCACGCCTTCCAGACTTTTA       | this study                      |
| HNT1 5' s1 R     | TACAGGCAGCATCAAGCGTA       | this study                      |
| HNT1 Int s2 F    | CTTACACTCACACCAATGATGG     | this study                      |
| HNT1 Intr s2 R   | AGGATGGAATTTTCGCCTGTT      | this study                      |
| HNT1 Ex s3 F     | ATCCCGGACGAATTCCTTAC       | this study                      |
| HNT1 Ex s3 R     | AAATGGAAGTGGACGTGGTC       | this study                      |
| RPL14B intron f  | AGGGCCGGAGATGTTTCTAT       | this study                      |
| RPL14B intron r  | TGGCAATTGAGGAGGTATGG       | this study                      |
| RPL14B exon f    | ATGGTCCAAAAGCTGGTGTC       | this study                      |
| RPL14B exon r    | GATGAAGCAGCCCACTTTTC       | this study                      |
| RPL34B intron f  | GTAAAAGGCGAACGAGTGTC       | this study                      |
| RPL34B intron r  | CTGGATACTGTTTCGTTTCATGCT   | this study                      |
| RPL34B exon f    | CTTTGAGACCAAGACAATACGC     | this study                      |
| RPL34B exon r    | GCAGCCTCAGTTTGTTCCTT       | this study                      |
| Intergenic IV F  | CGCATTACCAGACGGAGATGT      | (Vitaliano-Prunier et al. 2012) |
| Intergenic IV R  | CAAGCAAGCCTTGTGCATAAGA     | (Vitaliano-Prunier et al. 2012) |

### Supplementary Table 3 - Results of Splicing Microarrays

Log2 change in indicated genotype versus isogenic wild-type for each gene feature

| Genotype:         |                                                                 | <i>bre1Δ</i>         | <i>bre1Δ</i>         | <i>bre1Δ</i>         |
|-------------------|-----------------------------------------------------------------|----------------------|----------------------|----------------------|
| Strains compared: |                                                                 | W303 <i>bre1Δ</i> vs | W303 <i>bre1Δ</i> vs | W303 <i>bre1Δ</i> vs |
| Feature:          |                                                                 | W303                 | W303                 | W303                 |
|                   |                                                                 | Exon                 | Intron               | Junction             |
| Systematic Name   | Common Name                                                     |                      |                      |                      |
| SNR17A            | SNR17A                                                          | 0,034982246          | 0,863646606          | 1,161525056          |
| SNR17B            | SNR17B                                                          | 0,290145197          | 0,877674138          | 1,161525056          |
| YAL001C           | TFC3: transcription initiation from RNA polymerase III promoter | 0,202851075          | 0,049569878          | 0,073828287          |
| YAL003W           | EFB1: translational elongation                                  | -0,324738575         | 0,541959398          | -0,02859616          |
| YAL030W           | SNC1: endocytosis                                               | -0,141626155         | -0,021987833         | -0,644917808         |
| YBL018C           | POP8: rRNA processing                                           | -0,057776011         | -0,088204903         | -0,409384719         |
| YBL026W           | LSM2: nuclear mRNA splicing, via spliceosome                    | 0,568674706          | 0,802601822          | 0,053133311          |
| YBL027W           | RPL19B: protein biosynthesis                                    | -0,488533725         | 0,128093386          | 0,031888437          |
| YBL040C           | ERD2: protein retention in ER                                   | 0,111929436          | 0,427157871          | -0,144240846         |
| YBL050W           | SEC17: ER to Golgi transport                                    | 0,036537983          | 0,609634501          | -0,22935552          |
| YBL059C-A         | YBL059C-A: biological process unknown                           | 0,278681258          | 0,436697317          | 0,09452826           |
| YBL059W           | YBL059W: biological process unknown                             | 0,387898479          | 0,1974097            | 0,092071388          |
| YBL072C           | RPS8A: protein biosynthesis                                     | -0,632281443         | 0,151712384          | -0,616208134         |
| YBL087C           | RPL23A: protein biosynthesis                                    | -0,76915381          | 0,110983962          | -1,083003564         |
| YBL091C-A         | SCS22: biological process unknown                               | -0,032450816         | 0,439274829          | -0,126928129         |
| YBL092W           | RPL32: protein biosynthesis                                     | -0,565354945         | 0,044278553          | -0,711860814         |
| YBR048W           | RPS11B: protein biosynthesis                                    | -0,476540003         | 0,104889838          | -0,343149672         |
| YBR078W           | ECM33: cell wall organization and biogenesis                    | 0,43388661           | 0,370796912          | 0,040686244          |
| YBR082C           | UBC4: response to stress                                        | -0,098765558         | 0,919426428          | -0,063851368         |
| YBR084C-A         | RPL19A: protein biosynthesis                                    | -0,636063743         | 0,019975356          | -0,007029668         |

|           |                                                                   |              |              |              |
|-----------|-------------------------------------------------------------------|--------------|--------------|--------------|
| YBR089C-A | NHP6B: regulation of transcription from RNA polymerase II promot  | 1,012671733  | 0,290547787  | -0,023258089 |
| YBR119W   | MUD1: nuclear mRNA splicing, via spliceosome                      | -0,36142838  | -0,026043544 | -0,280156774 |
| YBR181C   | RPS6B: protein biosynthesis                                       | -0,210363308 | -0,054158193 | -1,432990494 |
| YBR186W   | PCH2: regulation of meiosis                                       | 0,552096385  | 0,123849745  | 0,03789808   |
| YBR189W   | RPS9B: protein biosynthesis                                       | -0,958802875 | -0,371199444 | -0,516377294 |
| YBR191W   | RPL21A: protein biosynthesis                                      | -1,197163767 | -0,177777577 | -0,068520524 |
| YBR219C   | YBR219C: biological process unknown                               | 0,576713108  | 0,125288709  | 0,109121695  |
| YBR230C   | YBR230C: biological process unknown                               | -0,791137462 | 0,255542929  | -0,388830773 |
| YCR028C-A | RIM1: mitochondrial genome maintenance                            | -0,544484803 | -0,006549073 | -0,485101308 |
| YCR031C   | RPS14A: protein biosynthesis                                      | -0,304467775 | -0,555447491 | -1,310566198 |
| YCR097W   | HMRA1: regulation of transcription, mating-type specific          | 0,150843777  | -0,04312638  | 0,072480249  |
| YCR097W_2 | HMRA1: regulation of transcription, mating-type specific          | 0,150843777  | 0,016672004  | -0,074764503 |
| YDL012C   | YDL012C: biological process unknown                               | 0,519821891  | 0,826075074  | 0,059971686  |
| YDL029W   | ARP2: actin filament organization                                 | -0,335583362 | 0,692434787  | 0,046119329  |
| YDL061C   | RPS29B: protein biosynthesis                                      | -0,226830934 | -0,131933571 | 0,039898141  |
| YDL064W   | UBC9: G2/M transition of mitotic cell cycle                       | -0,250954339 | -0,028594333 | 0,132096346  |
| YDL075W   | RPL31A: protein biosynthesis                                      | -0,997624656 | -0,175862947 | -1,006865584 |
| YDL079C   | MRK1: protein amino acid phosphorylation                          | 0,054832447  | -0,282604346 | 0,066384582  |
| YDL082W   | RPL13A: protein biosynthesis                                      | -0,793204574 | -0,268003895 | -0,068315536 |
| YDL083C   | RPS16B: protein biosynthesis                                      | -0,846493744 | -0,445057033 | -0,397537957 |
| YDL108W   | KIN28: protein amino acid phosphorylation                         | 0,121565052  | 0,004544094  | 0,152929926  |
| YDL115C   | IWR1: meiosis                                                     | 0,219957355  | 0,180821876  | 0,072151391  |
| YDL125C   | HNT1: nucleotide metabolism                                       | 0,572389318  | 0,935682952  | -0,081409964 |
| YDL130W   | RPP1B: translational elongation                                   | -0,010048775 | -0,16478897  | 0,132929029  |
| YDL136W   | RPL35B: protein biosynthesis                                      | -0,722275514 | -0,108704229 | -0,066405723 |
| YDL137W   | ARF2: ER to Golgi transport                                       | -0,122399914 | 0,585368517  | -0,913947099 |
| YDL189W   | RBS1: galactose metabolism                                        | -0,331837738 | -0,321978985 | 0,040116261  |
| YDL191W   | RPL35A: protein biosynthesis                                      | -0,545011228 | -0,094207261 | 0,014899093  |
| YDL219W   | DTD1: translation                                                 | -0,160998698 | 0,240805319  | -0,634319088 |
| YDR005C   | MAF1: negative regulation of transcription from RNA polymerase II | 0,284646447  | 0,305578391  | 0,038764566  |

|             |                                                                   |              |              |              |
|-------------|-------------------------------------------------------------------|--------------|--------------|--------------|
| YDR025W     | RPS11A: protein biosynthesis                                      | 0,178973103  | -0,068685405 | -0,076143528 |
| YDR059C     | UBC5: endocytosis                                                 | 0,48582988   | 0,383371258  | -0,031605937 |
| YDR064W     | RPS13: protein biosynthesis                                       | -0,628692093 | -0,539268754 | -1,006233353 |
| YDR092W     | UBC13: protein monoubiquitination                                 | 0,151128421  | 0,357215284  | 0,03137802   |
| YDR129C     | SAC6: endocytosis                                                 | 0,461827561  | 0,314573346  | 0,063065069  |
| YDR139C     | RUB1: protein deneddylation                                       | 0,327719093  | -0,05404045  | -0,056496807 |
| YDR305C     | HNT2: nucleoside catabolism                                       | 0,16067356   | 0,280318191  | -0,210011758 |
| YDR367W     | YDR367W: biological process unknown                               | -0,294011024 | -0,127845124 | -0,081470914 |
| YDR381W     | YRA1: mRNA-nucleus export                                         | 0,730726427  | 0,434352123  | -0,431939533 |
| YDR397C     | NCB2: negative regulation of transcription from RNA polymerase II | -0,346112293 | -0,172262787 | 0,156246563  |
| YDR424C     | DYN2: microtubule-based process                                   | 0,093066621  | 0,265574883  | -0,004309983 |
| YDR424C_2   | DYN2: microtubule-based process                                   | 0,093066621  | 0,132976724  | 0,095770992  |
| YDR447C     | RPS17B: protein biosynthesis                                      | -0,42604652  | 0,02274138   | -0,61802476  |
| YDR450W     | RPS18A: protein biosynthesis                                      | -0,790696423 | -0,0825671   | -0,051147076 |
| YDR471W     | RPL27B: protein biosynthesis                                      | -0,466208755 | 0,103327298  | -0,549157557 |
| YDR500C     | RPL37B: protein biosynthesis                                      | -0,183125949 | -0,122217448 | -0,032947287 |
| YEL012W     | UBC8: protein monoubiquitination                                  | 0,239707881  | 0,097118251  | 0,002297743  |
| YER003C     | PMI40: protein amino acid glycosylation                           | -0,031928549 | 0,171840295  | 0,033342481  |
| YER007C-A   | RBF20: biological process unknown                                 | -0,50867327  | -0,07400885  | -0,603375098 |
| YER044C-A   | MEI4: sporulation (sensu Fungi)                                   | 0,037441601  | 0,250868519  | 0,024009735  |
| YER056C-A   | RPL34A: protein biosynthesis                                      | 0,228368048  | 0,439986197  | -0,125488032 |
| YER074W     | RPS24A: protein biosynthesis                                      | 0,234757582  | -0,084677252 | -0,171535609 |
| YER074W-A   | YOS1: ER to Golgi transport                                       | -0,2143673   | 0,101990039  | 0,000742495  |
| YER074W-A_2 | YOS1: ER to Golgi transport                                       | -0,2143673   | -0,020512176 | 0,057623318  |
| YER093C-A   | YER093C-A: biological process unknown                             | -0,093310191 | 0,121888674  | -0,20506316  |
| YER102W     | RPS8B: protein biosynthesis                                       | -0,558659852 | -0,054229516 | -0,739914375 |
| YER117W     | RPL23B: protein biosynthesis                                      | -0,302266576 | -0,459996827 | -0,030698701 |
| YER131W     | RPS26B: protein biosynthesis                                      | -0,454730659 | 0,288285167  | 0,186031669  |
| YER133W     | GLC7: 35S primary transcript processing                           | 0,193126354  | 0,867965806  | -0,392807086 |
| YER179W     | DMC1: meiosis                                                     | 0,399818521  | -0,057091204 | 0,226869605  |

|           |                                                 |              |              |              |
|-----------|-------------------------------------------------|--------------|--------------|--------------|
| YFL034C-A | RPL22B: protein biosynthesis                    | -0,252040671 | -0,261266761 | -0,385308025 |
| YFL034C-B | MOB2: protein amino acid phosphorylation        | 0,20335105   | 0,210858162  | -0,07188022  |
| YFL039C   | ACT1: cell wall organization and biogenesis     | 0,633181522  | 1,221989781  | 0,306566377  |
| YFR024C-A | LSB3: actin filament organization               | 0,155768669  | -0,042789755 | -0,118063131 |
| YFR031C-A | RPL2A: protein biosynthesis                     | -0,52290442  | -0,079796008 | -0,400995542 |
| YFR032C-A | RPL29: protein biosynthesis                     | 0,024306205  | 0,271602023  | -0,086252233 |
| YGL030W   | RPL30: protein biosynthesis                     | -0,356521511 | -0,295890368 | -0,747657995 |
| YGL031C   | RPL24A: protein biosynthesis                    | -0,535579126 | -0,051786396 | 0,059403077  |
| YGL033W   | HOP2: synapsis                                  | -0,043903077 | -0,11461041  | -0,035532777 |
| YGL076C   | RPL7A: protein biosynthesis                     | -0,258970605 | 0,051449697  | -0,21503872  |
| YGL076C_2 | RPL7A: protein biosynthesis                     | -0,258970605 | -0,032113518 | -0,477779643 |
| YGL087C   | MMS2: DNA repair                                | -0,009543289 | 0,122333345  | -0,380168355 |
| YGL103W   | RPL28: protein biosynthesis                     | -0,190443788 | -0,089496657 | -0,04280824  |
| YGL137W   | SEC27: ER to Golgi transport                    | -0,197793325 | 0,528380111  | -0,674805399 |
| YGL178W   | MPT5: cell wall organization and biogenesis     | 0,640521747  | 1,128423452  | 0,561167511  |
| YGL187C   | COX4: aerobic respiration                       | -0,55788755  | -0,220795103 | 0,108381754  |
| YGL189C   | RPS26A: protein biosynthesis                    | -0,732115951 | -0,002292711 | -0,337322251 |
| YGL226C-A | OST5: protein amino acid N-linked glycosylation | 0,357544873  | 0,286775101  | 0,032451295  |
| YGL232W   | TAN1: tRNA modification                         | -0,032100848 | -0,052782221 | -0,308099599 |
| YGL251C   | HFM1: meiosis                                   | -0,234951988 | -0,033836236 | 0,061361767  |
| YGR001C   | YGR001C: biological process unknown             | 0,049993787  | -0,065084934 | -0,320054449 |
| YGR001C_2 | YGR001C: biological process unknown             | 0,049993787  | -0,027380515 | -0,487001651 |
| YGR027C   | RPS25A: protein biosynthesis                    | -0,648496906 | -0,035947752 | -0,073200899 |
| YGR029W   | ERV1: mitochondrion organization and biogenesis | -0,143470845 | 0,076663575  | -0,094470468 |
| YGR118W   | RPS23A: protein biosynthesis                    | -0,606221506 | 0,010388407  | 0,02520582   |
| YGR148C   | RPL24B: protein biosynthesis                    | -0,650076569 | -0,105598259 | -1,123716334 |
| YGR183C   | QCR9: aerobic respiration                       | 0,23048141   | 0,518217507  | -0,61961539  |
| YGR214W   | RPS0A: protein biosynthesis                     | 0,031575218  | -0,006129183 | -1,158292234 |
| YGR225W   | AMA1: sporulation (sensu Fungi)                 | 0,213049344  | 0,285393939  | 0,121140308  |
| YHL001W   | RPL14B: protein biosynthesis                    | -0,434961975 | 0,283798982  | -0,037697456 |



|           |                                                                 |              |              |              |
|-----------|-----------------------------------------------------------------|--------------|--------------|--------------|
| YHR001W-A | QCR10: aerobic respiration                                      | 1,137864375  | 0,198835774  | -0,527691849 |
| YHR010W   | RPL27A: protein biosynthesis                                    | -0,130488207 | 0,226675566  | -0,317585999 |
| YHR012W   | VPS29: retrograde transport, endosome to Golgi                  | -0,124701535 | -0,093776526 | 0,0572504    |
| YHR016C   | YSC84: endocytosis                                              | 0,209726096  | 0,371093405  | 0,283315651  |
| YHR021C   | RPS27B: protein biosynthesis                                    | -0,230059557 | 0,064764491  | -0,12517346  |
| YHR039C-A | VMA10: vacuolar acidification                                   | -0,061426108 | 0,235714629  | -0,271970281 |
| YHR041C   | SRB2: transcription from RNA polymerase II promoter             | -0,090537189 | 0,568304975  | 0,165794861  |
| YHR077C   | NMD2: mRNA catabolism                                           | 0,207610995  | 0,057508119  | 0,503269585  |
| YHR097C   | YHR097C: biological process unknown                             | 0,556152881  | 0,510529631  | 0,024909601  |
| YHR101C   | BIG1: cell wall biosynthesis (sensu Fungi)                      | 0,208969094  | -0,002340069 | 0,067797803  |
| YHR123W   | EPT1: phosphatidylethanolamine biosynthesis                     | 0,19836488   | 0,40066612   | -0,735758313 |
| YHR141C   | RPL42B: protein biosynthesis                                    | -0,575117786 | -0,071643512 | -0,84297566  |
| YHR203C   | RPS4B: protein biosynthesis                                     | -0,298809225 | -0,257121936 | -0,298789015 |
| YIL004C   | BET1: ER to Golgi transport                                     | -0,160445789 | -0,168163818 | -0,126439735 |
| YIL018W   | RPL2B: protein biosynthesis                                     | -0,163310923 | -0,158577373 | -0,153260503 |
| YIL052C   | RPL34B: protein biosynthesis                                    | -0,349858729 | 0,167194036  | -0,137291286 |
| YIL069C   | RPS24B: protein biosynthesis                                    | -0,357965238 | -0,251406372 | -0,648859561 |
| YIL106W   | MOB1: protein amino acid phosphorylation                        | 0,191409135  | 0,288419994  | -0,074397375 |
| YIL111W   | COX5B: mitochondrial electron transport, cytochrome c to oxygen | 0,277266045  | 0,419940738  | -0,336878122 |
| YIL133C   | RPL16A: protein biosynthesis                                    | -0,144619218 | -0,033866301 | -0,043555785 |
| YIL148W   | RPL40A: protein biosynthesis                                    | -0,574949777 | -0,385355146 | -1,472426961 |
| YJL001W   | PRE3: response to stress                                        | 0,001143531  | 0,03538539   | -0,493770551 |
| YJL024C   | APS3: vesicle-mediated transport                                | -0,309275934 | 0,089123289  | 0,093230166  |
| YJL041W   | NSP1: mRNA-nucleus export                                       | 0,282291152  | 0,266139993  | 0,272069283  |
| YJL136C   | RPS21B: protein biosynthesis                                    | -0,649677445 | -0,251878766 | -0,057621892 |
| YJL177W   | RPL17B: protein biosynthesis                                    | -0,342177925 | -0,111520448 | 0,088754135  |
| YJL189W   | RPL39: protein biosynthesis                                     | -0,279694534 | -0,220939505 | -0,341104461 |
| YJL191W   | RPS14B: protein biosynthesis                                    | 0,44883612   | 0,561881587  | 0,293536392  |
| YJL205C   | NCE1: biological process unknown                                | 0,091381169  | 0,327352493  | -0,069415941 |
| YJR021C   | REC107: meiotic recombination                                   | 0,162227044  | 0,023448037  | 0,040569078  |

|           |                                              |              |              |              |
|-----------|----------------------------------------------|--------------|--------------|--------------|
| YJR094W-A | RPL43B: protein biosynthesis                 | -0,699311792 | 0,064878683  | -0,832144377 |
| YJR145C   | RPS4A: protein biosynthesis                  | -0,82421542  | -0,090673729 | -0,355244708 |
| YKL002W   | DID4: protein retention in Golgi             | 0,179274369  | 0,235416417  | 0,109303261  |
| YKL006C-A | SFT1: intra-Golgi transport                  | 0,176660683  | 0,120969058  | 0,097998494  |
| YKL006W   | RPL14A: protein biosynthesis                 | 0,058088724  | -0,068771539 | -0,27500143  |
| YKL081W   | TEF4: translational elongation               | -0,360324016 | 0,197922329  | -0,012161548 |
| YKL156W   | RPS27A: protein biosynthesis                 | -0,408824866 | 0,012779556  | -0,210687526 |
| YKL157W   | APE2: peptide metabolism                     | 0,446502298  | -0,400962291 | -0,035610003 |
| YKL180W   | RPL17A: protein biosynthesis                 | -1,109373551 | 0,069243604  | -1,122000999 |
| YKL186C   | MTR2: poly(A)+ mRNA-nucleus export           | -0,047876992 | -0,031981152 | -0,053805179 |
| YKL186C_2 | MTR2: poly(A)+ mRNA-nucleus export           | -0,047876992 | 0,05502392   | 0,05334635   |
| YKL186C_3 | MTR2: poly(A)+ mRNA-nucleus export           | -0,047876992 | -0,003306155 | 0,061339762  |
| YKL186C_4 | MTR2: poly(A)+ mRNA-nucleus export           | -0,047876992 | -0,032320646 | -0,124985271 |
| YKL186C_5 | MTR2: poly(A)+ mRNA-nucleus export           | -0,047876992 | 0,026791703  | 0,034890922  |
| YKL186C_6 | MTR2: poly(A)+ mRNA-nucleus export           | -0,047876992 | -0,064290673 | -0,029831231 |
| YKL190W   | CNB1: cell wall organization and biogenesis  | -0,255355584 | 0,243069933  | 0,060360423  |
| YKR057W   | RPS21A: protein biosynthesis                 | -1,009820462 | 0,076128831  | -0,308976708 |
| YKR094C   | RPL40B: protein biosynthesis                 | -0,505300079 | -0,310522605 | -0,29528474  |
| YLL050C   | COF1: actin filament organization            | -0,644712931 | -0,040033145 | 0,147511112  |
| YLR048W   | RPS0B: protein biosynthesis                  | -0,509679713 | -0,008085021 | -0,081213785 |
| YLR061W   | RPL22A: protein biosynthesis                 | -0,323307377 | -0,012220097 | -0,119661069 |
| YLR078C   | BOS1: ER to Golgi transport                  | -0,18011104  | -0,113453788 | -0,048193038 |
| YLR093C   | NYV1: vesicle fusion                         | 0,009077876  | 0,484638863  | -0,159636041 |
| YLR128W   | DCN1: protein neddylation                    | -0,069242451 | 0,460019903  | 0,041906816  |
| YLR185W   | RPL37A: protein biosynthesis                 | -1,029617971 | -0,193289405 | -1,114781542 |
| YLR211C   | YLR211C: biological process unknown          | 0,070155212  | 0,158846174  | 0,021071101  |
| YLR275W   | SMD2: nuclear mRNA splicing, via spliceosome | -0,154295199 | -0,226017382 | -0,127884714 |
| YLR287C-A | RPS30A: protein biosynthesis                 | 0,764719371  | -0,090508849 | -0,239800462 |
| YLR306W   | UBC12: protein monoubiquitination            | -0,158528378 | -0,003409689 | -0,134554141 |
| YLR316C   | TAD3: tRNA modification                      | 0,144843476  | 0,009486721  | 0,114776128  |

|           |                                                           |              |              |              |
|-----------|-----------------------------------------------------------|--------------|--------------|--------------|
| YLR316C_2 | TAD3: tRNA modification                                   | 0,144843476  | -0,017154677 | 0,068462634  |
| YLR333C   | RPS25B: protein biosynthesis                              | -0,414927812 | 0,045845477  | -0,023561075 |
| YLR344W   | RPL26A: protein biosynthesis                              | -0,975764317 | 0,135752687  | -0,024227098 |
| YLR367W   | RPS22B: protein biosynthesis                              | -0,03782353  | -0,088072224 | -0,357199728 |
| YLR367W_2 | RPS22B: protein biosynthesis                              | -0,03782353  | -0,466114863 | -0,843073862 |
| YLR388W   | RPS29A: protein biosynthesis                              | -0,306744291 | -0,069124134 | -0,661950439 |
| YLR406C   | RPL31B: protein biosynthesis                              | -0,641334812 | 0,033536592  | -1,248135496 |
| YLR426W   | YLR426W: biological process unknown                       | 0,398333653  | 0,348537533  | -0,070140422 |
| YLR448W   | RPL6B: protein biosynthesis                               | -0,942963589 | -0,20068512  | -0,774808761 |
| YML024W   | RPS17A: protein biosynthesis                              | -0,63980227  | 0,135706951  | -0,622338199 |
| YML025C   | YML6: protein biosynthesis                                | -0,103016771 | 0,027600125  | 0,019201119  |
| YML026C   | RPS18B: protein biosynthesis                              | -0,50680937  | -0,074686431 | -0,500272485 |
| YML034W   | SRC1: mitotic sister chromatid segregation                | 0,303567009  | 0,144168728  | -0,068670678 |
| YML034W_2 | SRC1: mitotic sister chromatid segregation                | 0,303567009  | 0,053313611  | 0,004279062  |
| YML056C   | IMD4: biological process unknown                          | -0,216141406 | 0,124921437  | -0,483141051 |
| YML067C   | ERV41: ER to Golgi transport                              | 0,017477862  | 0,094332517  | -0,846296769 |
| YML073C   | RPL6A: protein biosynthesis                               | -0,990685083 | -0,023253422 | -0,741328314 |
| YML085C   | TUB1: mitotic sister chromatid segregation                | -0,172564455 | 0,258079008  | -0,242845938 |
| YML094W   | GIM5: tubulin folding                                     | -0,055308907 | 0,146258954  | -0,521991784 |
| YML124C   | TUB3: mitotic sister chromatid segregation                | 0,234045597  | 0,371645694  | -0,236340737 |
| YMR033W   | ARP9: chromatin remodeling                                | 0,194822882  | 0,268047822  | -0,326235686 |
| YMR079W   | SEC14: sporulation (sensu Fungi)                          | -0,232627028 | -0,126441112 | -0,011919236 |
| YMR116C   | ASC1: biological process unknown                          | -1,041718025 | -0,054062101 | -0,968667324 |
| YMR125W   | STO1: nuclear mRNA splicing, via spliceosome              | 0,082940782  | 0,250166402  | 0,033906475  |
| YMR133W   | REC114: meiotic recombination                             | 0,158670074  | 0,178539244  | 0,061351288  |
| YMR142C   | RPL13B: protein biosynthesis                              | -1,401511223 | -0,241755008 | -1,645354798 |
| YMR143W   | RPS16A: protein biosynthesis                              | -1,441683052 | -0,128970551 | -1,14341496  |
| YMR194W   | RPL36A: protein biosynthesis                              | -0,09908923  | 0,186882598  | -0,539447498 |
| YMR201C   | RAD14: nucleotide-excision repair, DNA damage recognition | 0,056819119  | -0,036694366 | -0,019784258 |
| YMR225C   | MRPL44: protein biosynthesis                              | -0,191881657 | 0,09978866   | -0,480831679 |

|         |                                                                     |              |              |              |
|---------|---------------------------------------------------------------------|--------------|--------------|--------------|
| YMR230W | RPS10B: protein biosynthesis                                        | -0,917903972 | -0,220319567 | -0,935114845 |
| YMR292W | GOT1: ER to Golgi transport                                         | 0,298858546  | 0,996109885  | -0,016227626 |
| YNL012W | SPO1: meiosis                                                       | 0,50471612   | -0,102839961 | -0,188651923 |
| YNL044W | YIP3: ER to Golgi transport                                         | 0,308966037  | 0,373021443  | -0,019834918 |
| YNL050C | YNL050C: biological process unknown                                 | 0,132252864  | -0,090101452 | 0,028910293  |
| YNL069C | RPL16B: protein biosynthesis                                        | -0,556251391 | 0,005786373  | -0,014167879 |
| YNL096C | RPS7B: protein biosynthesis                                         | 0,176025306  | 0,3655022    | -0,344091047 |
| YNL112W | DBP2: mRNA catabolism, nonsense-mediated decay                      | 0,282894262  | 0,529809043  | 0,562207703  |
| YNL130C | CPT1: phosphatidylcholine biosynthesis                              | -0,008528604 | 0,47480777   | -0,067035282 |
| YNL147W | LSM7: nuclear mRNA splicing, via spliceosome                        | 0,112899214  | 0,118747912  | -0,174423749 |
| YNL162W | RPL42A: protein biosynthesis                                        | -0,1933077   | -0,11001455  | -0,899082261 |
| YNL246W | VPS75: protein-vacuolar targeting                                   | -0,021168341 | 0,130182009  | -0,280765425 |
| YNL265C | IST1: protein biosynthesis                                          | -0,100692267 | -0,030062461 | -0,542470198 |
| YNL301C | RPL18B: protein biosynthesis                                        | -0,272665709 | -0,273192875 | -0,153572455 |
| YNL302C | RPS19B: protein biosynthesis                                        | -1,224017575 | -0,092729353 | -0,892021592 |
| YNL312W | RFA2: DNA recombination                                             | 0,073537454  | 0,015063308  | -0,00661734  |
| YNR053C | NOG2: ribosome assembly                                             | 0,269651309  | 1,050662924  | 0,02975042   |
| YOL047C | YOL047C: biological process unknown                                 | 0,948555168  | 0,665820898  | 0,413123626  |
| YOL048C | YOL048C: biological process unknown                                 | 0,07686342   | 0,064048109  | 0,431210289  |
| YOL120C | RPL18A: protein biosynthesis                                        | -0,888065163 | -0,303770915 | -0,310236295 |
| YOL121C | RPS19A: protein biosynthesis                                        | -0,75757508  | 0,029516485  | -0,062676929 |
| YOL127W | RPL25: protein biosynthesis                                         | -0,558037054 | 0,085394632  | -0,513726285 |
| YOR096W | RPS7A: protein biosynthesis                                         | -0,83888377  | 0,01672735   | -1,014154686 |
| YOR122C | PFY1: response to osmotic stress                                    | -0,230853125 | 0,59638779   | 0,037127469  |
| YOR182C | RPS30B: protein biosynthesis                                        | -0,117594616 | -0,179306173 | -0,242277733 |
| YOR234C | RPL33B: protein biosynthesis                                        | -0,133594344 | 0,232016964  | -0,092884312 |
| YOR293W | RPS10A: protein biosynthesis                                        | -0,674476637 | 0,135221918  | -0,674323458 |
| YOR312C | RPL20B: protein biosynthesis                                        | -1,120037724 | -0,477230848 | -1,436287566 |
| YPL031C | PHO85: protein amino acid phosphorylation                           | -0,0452194   | 0,277745652  | -0,582385808 |
| YPL075W | GCR1: positive regulation of transcription from RNA polymerase II ] | 0,186955297  | -0,309873829 | 0,016540285  |

|           |                                                      |              |              |              |
|-----------|------------------------------------------------------|--------------|--------------|--------------|
| YPL079W   | RPL21B: protein biosynthesis                         | -0,873861365 | -0,14067805  | -0,061735157 |
| YPL081W   | RPS9A: protein biosynthesis                          | 0,019454253  | 0,083631847  | -0,018921872 |
| YPL090C   | RPS6A: protein biosynthesis                          | -0,526854683 | -0,181511363 | -1,011065718 |
| YPL129W   | TAF14: chromatin remodeling                          | -0,044597021 | -0,128541779 | -0,024336372 |
| YPL143W   | RPL33A: protein biosynthesis                         | -0,583280709 | -0,116895903 | -0,01652646  |
| YPL175W   | SPT14: GPI anchor biosynthesis                       | -0,047440799 | -0,122927316 | -0,035873592 |
| YPL198W   | RPL7B: protein biosynthesis                          | -0,370898149 | 0,2178283    | -0,173180489 |
| YPL198W_2 | RPL7B: protein biosynthesis                          | -0,370898149 | 0,342334446  | -0,221431823 |
| YPL218W   | SAR1: ER to Golgi transport                          | -0,475770339 | 0,596545805  | -0,375767098 |
| YPL241C   | CIN2: microtubule-based process                      | 0,255322119  | 0,209662941  | 0,072280269  |
| YPL249C-A | RPL36B: protein biosynthesis                         | -0,843593637 | 0,367091486  | -0,17007721  |
| YPR028W   | YOP1: vesicle-mediated transport                     | -0,3325031   | 1,290492778  | -0,095385103 |
| YPR043W   | RPL43A: protein biosynthesis                         | -0,846806779 | 0,001810849  | -0,551509841 |
| YPR063C   | YPR063C: biological process unknown                  | -0,659284799 | 0,028645296  | -1,255909347 |
| YPR098C   | YPR098C: biological process unknown                  | 0,052837743  | 0,76024146   | -0,094743768 |
| YPR132W   | RPS23B: protein biosynthesis                         | -0,156691488 | -0,004123436 | -1,109517    |
| YPR187W   | RPO26: transcription from RNA polymerase II promoter | 0,070175415  | -0,02626417  | 0,028208447  |

Genotype:  
 Strains compared:  
 Feature:

*htb1K123R*      *htb1K123R*      *htb1K123R*  
 Y133 vs Y131    Y133 vs Y131    Y133 vs Y131  
 Exon              Intron              Junction

| Systematic Name | Common Name                                                     |              |             |              |
|-----------------|-----------------------------------------------------------------|--------------|-------------|--------------|
| SNR17A          | SNR17A                                                          | 0,036549804  | 0,633105941 | 0,22353502   |
| SNR17B          | SNR17B                                                          | 0,02727521   | 0,843829809 | 0,22353502   |
| YAL001C         | TFC3: transcription initiation from RNA polymerase III promoter | 0,183963462  | 0,10844419  | 0,059184514  |
| YAL003W         | EFB1: translational elongation                                  | -0,269499233 | 0,188971    | 0,029484719  |
| YAL030W         | SNC1: endocytosis                                               | 0,106701516  | 0,181329543 | -0,176351994 |

|           |                                                                  |              |              |              |
|-----------|------------------------------------------------------------------|--------------|--------------|--------------|
| YBL018C   | POP8: rRNA processing                                            | 0,078593703  | 0,043213854  | -0,035426901 |
| YBL026W   | LSM2: nuclear mRNA splicing, via spliceosome                     | 0,119524809  | 0,271702715  | -0,013377785 |
| YBL027W   | RPL19B: protein biosynthesis                                     | -0,338174837 | -0,217775189 | 0,072440536  |
| YBL040C   | ERD2: protein retention in ER                                    | 0,110420553  | 0,209168211  | 0,189937269  |
| YBL050W   | SEC17: ER to Golgi transport                                     | -0,002680909 | 0,290772004  | 0,153411658  |
| YBL059C-A | YBL059C-A: biological process unknown                            | 0,067624312  | 0,192399599  | 0,169690193  |
| YBL059W   | YBL059W: biological process unknown                              | 0,166781509  | 0,102905692  | -0,006985976 |
| YBL072C   | RPS8A: protein biosynthesis                                      | -0,343230955 | 0,010969716  | -0,350340054 |
| YBL087C   | RPL23A: protein biosynthesis                                     | -0,373106641 | -0,154626676 | -0,383418509 |
| YBL091C-A | SCS22: biological process unknown                                | 0,083956745  | 0,405992484  | -0,119394247 |
| YBL092W   | RPL32: protein biosynthesis                                      | -0,402828422 | -0,003229225 | -0,5128709   |
| YBR048W   | RPS11B: protein biosynthesis                                     | -0,315821882 | -0,086435318 | -0,15585055  |
| YBR078W   | ECM33: cell wall organization and biogenesis                     | -0,105642154 | 0,108234499  | 0,221328248  |
| YBR082C   | UBC4: response to stress                                         | -0,159650069 | 0,205421553  | 0,329157578  |
| YBR084C-A | RPL19A: protein biosynthesis                                     | -0,187213553 | -0,135796514 | 0,023644601  |
| YBR089C-A | NHP6B: regulation of transcription from RNA polymerase II promot | 0,455739761  | 0,060204286  | 0,048891486  |
| YBR119W   | MUD1: nuclear mRNA splicing, via spliceosome                     | -0,077658707 | -0,004492688 | -0,13444343  |
| YBR181C   | RPS6B: protein biosynthesis                                      | -0,099360289 | -0,206249303 | -0,47418038  |
| YBR186W   | PCH2: regulation of meiosis                                      | -0,019373384 | 0,070663109  | 0,111957604  |
| YBR189W   | RPS9B: protein biosynthesis                                      | -0,486986115 | -0,315608826 | -0,329595628 |
| YBR191W   | RPL21A: protein biosynthesis                                     | -0,347924728 | -0,329233217 | 0,098275565  |
| YBR219C   | YBR219C: biological process unknown                              | 0,088333276  | -0,098743507 | 0,241094959  |
| YBR230C   | YBR230C: biological process unknown                              | 0,103860703  | 0,340346897  | -0,251803196 |
| YCR028C-A | RIM1: mitochondrial genome maintenance                           | -0,012570058 | -0,202443905 | 0,015734808  |
| YCR031C   | RPS14A: protein biosynthesis                                     | 0,066902002  | -0,539855233 | -0,291748222 |
| YCR097W   | HMRA1: regulation of transcription, mating-type specific         | 0,239571548  | 0,055329974  | 0,218416364  |
| YCR097W_2 | HMRA1: regulation of transcription, mating-type specific         | 0,239571548  | 0,145627974  | -0,021774606 |
| YDL012C   | YDL012C: biological process unknown                              | 0,251284344  | 0,24872668   | 0,160873619  |
| YDL029W   | ARP2: actin filament organization                                | 0,052777648  | 0,160142676  | 0,192510619  |
| YDL061C   | RPS29B: protein biosynthesis                                     | -0,03026936  | -0,165070422 | 0,012931044  |

|           |                                                                   |              |              |              |
|-----------|-------------------------------------------------------------------|--------------|--------------|--------------|
| YDL064W   | UBC9: G2/M transition of mitotic cell cycle                       | -0,134763952 | 0,186793847  | 0,231960388  |
| YDL075W   | RPL31A: protein biosynthesis                                      | -0,442341131 | -0,073384532 | -0,360247053 |
| YDL079C   | MRK1: protein amino acid phosphorylation                          | -0,068640841 | -0,043771524 | 0,112884915  |
| YDL082W   | RPL13A: protein biosynthesis                                      | -0,368229581 | -0,014873773 | 0,040636698  |
| YDL083C   | RPS16B: protein biosynthesis                                      | -0,316021073 | -0,29283382  | -0,176768731 |
| YDL108W   | KIN28: protein amino acid phosphorylation                         | -0,002179    | -0,112438684 | 0,113607232  |
| YDL115C   | IWR1: meiosis                                                     | 0,215358926  | 0,131103936  | 0,165286489  |
| YDL125C   | HNT1: nucleotide metabolism                                       | 0,279705779  | 0,594603882  | -0,13044429  |
| YDL130W   | RPP1B: translational elongation                                   | 0,075696278  | -0,073041172 | -0,018367124 |
| YDL136W   | RPL35B: protein biosynthesis                                      | -0,23283701  | -0,107568086 | 0,025790744  |
| YDL137W   | ARF2: ER to Golgi transport                                       | 0,056061757  | 0,271434702  | 0,846087812  |
| YDL189W   | RBS1: galactose metabolism                                        | -0,109389279 | -0,085160853 | 0,103722699  |
| YDL191W   | RPL35A: protein biosynthesis                                      | -0,150536859 | -0,221069356 | -0,059436096 |
| YDL219W   | DTD1: translation                                                 | -0,291167552 | 0,02630324   | -0,56573435  |
| YDR005C   | MAF1: negative regulation of transcription from RNA polymerase II | 0,097882203  | 0,123372633  | 0,210341601  |
| YDR025W   | RPS11A: protein biosynthesis                                      | -0,086227278 | 0,043359234  | -0,033120688 |
| YDR059C   | UBC5: endocytosis                                                 | 0,274373236  | 0,228114751  | 0,079321184  |
| YDR064W   | RPS13: protein biosynthesis                                       | -0,157767931 | -0,210965124 | -0,324116163 |
| YDR092W   | UBC13: protein monoubiquitination                                 | 0,114746269  | 0,315098455  | 0,157869786  |
| YDR129C   | SAC6: endocytosis                                                 | 0,292356289  | 0,278235761  | 0,092956473  |
| YDR139C   | RUB1: protein deneddylation                                       | 0,255978932  | 0,034489496  | 0,066434876  |
| YDR305C   | HNT2: nucleoside catabolism                                       | -0,005785712 | 0,127796309  | -0,120392699 |
| YDR367W   | YDR367W: biological process unknown                               | -0,159660519 | 0,083328425  | 0,153004461  |
| YDR381W   | YRA1: mRNA-nucleus export                                         | 0,3413275    | 0,164806849  | -0,227086856 |
| YDR397C   | NCB2: negative regulation of transcription from RNA polymerase II | -0,0022658   | 0,234402193  | 0,046874508  |
| YDR424C   | DYN2: microtubule-based process                                   | 0,115374371  | 0,15666389   | 0,03685928   |
| YDR424C_2 | DYN2: microtubule-based process                                   | 0,115374371  | 0,168942861  | 0,133418536  |
| YDR447C   | RPS17B: protein biosynthesis                                      | -0,041325976 | 0,036132597  | -0,026803176 |
| YDR450W   | RPS18A: protein biosynthesis                                      | -0,267425253 | -0,034803078 | -0,050559691 |
| YDR471W   | RPL27B: protein biosynthesis                                      | 0,007591309  | 0,212209154  | -0,162981941 |

|             |                                             |              |              |              |
|-------------|---------------------------------------------|--------------|--------------|--------------|
| YDR500C     | RPL37B: protein biosynthesis                | -0,115520629 | -0,069702747 | -0,044917409 |
| YEL012W     | UBC8: protein monoubiquitination            | 0,207977882  | 0,092504352  | 0,139159352  |
| YER003C     | PMI40: protein amino acid glycosylation     | 0,035958647  | 0,115010652  | 0,202751673  |
| YER007C-A   | RBF20: biological process unknown           | -0,054539131 | 0,206784153  | -0,266709489 |
| YER044C-A   | MEI4: sporulation (sensu Fungi)             | 0,014969013  | 0,059255833  | 0,009254499  |
| YER056C-A   | RPL34A: protein biosynthesis                | -0,166721674 | -0,28806445  | -0,012154903 |
| YER074W     | RPS24A: protein biosynthesis                | 0,073211683  | -0,26916449  | -0,115903021 |
| YER074W-A   | YOS1: ER to Golgi transport                 | 0,050942795  | 0,2414827    | -0,046243191 |
| YER074W-A_2 | YOS1: ER to Golgi transport                 | 0,050942795  | -0,054429222 | -0,135580852 |
| YER093C-A   | YER093C-A: biological process unknown       | -0,077721968 | 0,02183537   | -0,272728843 |
| YER102W     | RPS8B: protein biosynthesis                 | -0,255366913 | -0,161623649 | -0,414734598 |
| YER117W     | RPL23B: protein biosynthesis                | -0,016263425 | -0,200082926 | -0,007370448 |
| YER131W     | RPS26B: protein biosynthesis                | -0,221330624 | 0,172242745  | 0,112142328  |
| YER133W     | GLC7: 35S primary transcript processing     | 0,113663137  | 0,296954173  | -0,143778804 |
| YER179W     | DMC1: meiosis                               | 0,25913456   | 0,013953693  | 0,478128723  |
| YFL034C-A   | RPL22B: protein biosynthesis                | -0,109044747 | -0,128057979 | -0,204263044 |
| YFL034C-B   | MOB2: protein amino acid phosphorylation    | 0,244052465  | -0,013594864 | -0,046702254 |
| YFL039C     | ACT1: cell wall organization and biogenesis | 0,170315972  | 0,415351624  | 0,144654566  |
| YFR024C-A   | LSB3: actin filament organization           | -0,076911657 | -0,119778629 | 0,174684727  |
| YFR031C-A   | RPL2A: protein biosynthesis                 | -0,212360022 | -0,099341153 | -0,163709335 |
| YFR032C-A   | RPL29: protein biosynthesis                 | -0,092560756 | 0,06547577   | -0,178494957 |
| YGL030W     | RPL30: protein biosynthesis                 | -0,168802502 | -0,203145042 | -0,318297151 |
| YGL031C     | RPL24A: protein biosynthesis                | -0,211995209 | -0,161657336 | -0,027918023 |
| YGL033W     | HOP2: synapsis                              | 0,008982209  | -0,030971905 | 0,072027004  |
| YGL076C     | RPL7A: protein biosynthesis                 | -0,156727472 | -0,000473268 | -0,051513406 |
| YGL076C_2   | RPL7A: protein biosynthesis                 | -0,156727472 | 0,089443963  | -0,241530979 |
| YGL087C     | MMS2: DNA repair                            | 0,041785304  | 0,073401984  | -0,182256325 |
| YGL103W     | RPL28: protein biosynthesis                 | -0,099456236 | -0,081275216 | -0,016715981 |
| YGL137W     | SEC27: ER to Golgi transport                | 0,024431827  | 0,284421185  | -0,112268625 |
| YGL178W     | MPT5: cell wall organization and biogenesis | 0,094713379  | 0,332339135  | 0,226832625  |



|           |                                                     |              |              |              |
|-----------|-----------------------------------------------------|--------------|--------------|--------------|
| YGL187C   | COX4: aerobic respiration                           | -0,073387416 | -0,050489331 | 0,100654343  |
| YGL189C   | RPS26A: protein biosynthesis                        | -0,296926598 | -0,117388382 | 0,284422348  |
| YGL226C-A | OST5: protein amino acid N-linked glycosylation     | 0,126534155  | 0,354700774  | -0,006882638 |
| YGL232W   | TAN1: tRNA modification                             | 0,103294604  | -0,080604228 | -0,255840396 |
| YGL251C   | HFM1: meiosis                                       | -0,439170954 | -0,030396905 | 0,047733749  |
| YGR001C   | YGR001C: biological process unknown                 | 0,028981605  | 0,054440236  | -0,228874828 |
| YGR001C_2 | YGR001C: biological process unknown                 | 0,028981605  | -0,011648484 | -0,32077652  |
| YGR027C   | RPS25A: protein biosynthesis                        | -0,277807086 | -0,018606683 | 0,095872607  |
| YGR029W   | ERV1: mitochondrion organization and biogenesis     | 0,023703541  | 0,031237835  | -0,110263503 |
| YGR118W   | RPS23A: protein biosynthesis                        | -0,261901083 | 0,098795176  | 0,00244516   |
| YGR148C   | RPL24B: protein biosynthesis                        | -0,310121486 | -0,083118369 | -0,606738926 |
| YGR183C   | QCR9: aerobic respiration                           | 0,232169854  | 0,142861237  | 0,106074921  |
| YGR214W   | RPS0A: protein biosynthesis                         | -0,186689234 | -0,309701924 | -0,240048571 |
| YGR225W   | AMA1: sporulation (sensu Fungi)                     | 0,137038354  | -0,014381919 | 0,126672198  |
| YHL001W   | RPL14B: protein biosynthesis                        | -0,267574212 | 0,418687801  | -0,135679942 |
| YHR001W-A | QCR10: aerobic respiration                          | 0,17853558   | 0,226563974  | 0,058639676  |
| YHR010W   | RPL27A: protein biosynthesis                        | 0,015150867  | -0,005082465 | 0,090062012  |
| YHR012W   | VPS29: retrograde transport, endosome to Golgi      | -0,026835097 | -0,080320871 | 0,011352747  |
| YHR016C   | YSC84: endocytosis                                  | 0,087833554  | 0,074419021  | 0,319888837  |
| YHR021C   | RPS27B: protein biosynthesis                        | -0,241830433 | -0,065739063 | 0,006547711  |
| YHR039C-A | VMA10: vacuolar acidification                       | 0,0856885    | 0,136183895  | 0,143500859  |
| YHR041C   | SRB2: transcription from RNA polymerase II promoter | 0,055339409  | 0,359442227  | 0,214214204  |
| YHR077C   | NMD2: mRNA catabolism                               | 0,150523545  | 0,160793544  | 0,487468174  |
| YHR097C   | YHR097C: biological process unknown                 | 0,272356781  | 0,188015234  | -0,060450002 |
| YHR101C   | BIG1: cell wall biosynthesis (sensu Fungi)          | -0,009167023 | 0,288435374  | 0,033649236  |
| YHR123W   | EPT1: phosphatidylethanolamine biosynthesis         | -0,189829015 | 0,232078761  | -0,352818317 |
| YHR141C   | RPL42B: protein biosynthesis                        | -0,177121723 | 0,075772079  | -0,270166255 |
| YHR203C   | RPS4B: protein biosynthesis                         | -0,076849723 | -0,038107045 | -0,064099796 |
| YIL004C   | BET1: ER to Golgi transport                         | 0,026647557  | 0,024808659  | 0,066743549  |
| YIL018W   | RPL2B: protein biosynthesis                         | 0,06734508   | -0,219282157 | -0,184509077 |

|           |                                                                 |              |              |              |
|-----------|-----------------------------------------------------------------|--------------|--------------|--------------|
| YIL052C   | RPL34B: protein biosynthesis                                    | -0,11992513  | 0,245509248  | -0,083330462 |
| YIL069C   | RPS24B: protein biosynthesis                                    | -0,13080098  | -0,263852842 | -0,088258351 |
| YIL106W   | MOB1: protein amino acid phosphorylation                        | 0,037317707  | 0,154346317  | -0,068264114 |
| YIL111W   | COX5B: mitochondrial electron transport, cytochrome c to oxygen | -0,138836977 | 0,105417821  | -0,093310951 |
| YIL133C   | RPL16A: protein biosynthesis                                    | -0,195700665 | 0,020963049  | 0,148280525  |
| YIL148W   | RPL40A: protein biosynthesis                                    | -0,059831908 | -0,124425069 | -0,102645223 |
| YJL001W   | PRE3: response to stress                                        | 0,011974921  | 0,164968978  | -0,220629544 |
| YJL024C   | APS3: vesicle-mediated transport                                | -0,141092416 | -0,019395125 | -0,003201849 |
| YJL041W   | NSP1: mRNA-nucleus export                                       | 0,179392746  | 0,156191153  | 0,324002669  |
| YJL136C   | RPS21B: protein biosynthesis                                    | -0,181921747 | -0,316463235 | -0,006613365 |
| YJL177W   | RPL17B: protein biosynthesis                                    | -0,296602559 | -0,0357092   | 0,067982928  |
| YJL189W   | RPL39: protein biosynthesis                                     | -0,125274545 | -0,093225744 | -0,16916053  |
| YJL191W   | RPS14B: protein biosynthesis                                    | 0,028430038  | -0,090726757 | -0,0618906   |
| YJL205C   | NCE1: biological process unknown                                | 0,163908867  | 0,372852332  | 0,017226747  |
| YJR021C   | REC107: meiotic recombination                                   | 0,209128406  | 0,081634409  | 0,156806767  |
| YJR094W-A | RPL43B: protein biosynthesis                                    | -0,171711737 | 0,043198572  | -0,103608034 |
| YJR145C   | RPS4A: protein biosynthesis                                     | -0,365381444 | 0,042969524  | -0,263778443 |
| YKL002W   | DID4: protein retention in Golgi                                | 0,245810577  | 0,128693255  | 0,258220087  |
| YKL006C-A | SFT1: intra-Golgi transport                                     | 0,119874271  | 0,265536357  | 0,015141741  |
| YKL006W   | RPL14A: protein biosynthesis                                    | -0,06478349  | -0,230181062 | -0,17175318  |
| YKL081W   | TEF4: translational elongation                                  | -0,197157723 | 0,259630286  | -0,163888945 |
| YKL156W   | RPS27A: protein biosynthesis                                    | -0,258013218 | 0,012611594  | -0,073160782 |
| YKL157W   | APE2: peptide metabolism                                        | 0,353636902  | -0,511775451 | 0,073606281  |
| YKL180W   | RPL17A: protein biosynthesis                                    | -0,417662856 | 0,04541195   | -0,456482546 |
| YKL186C   | MTR2: poly(A)+ mRNA-nucleus export                              | -0,136919971 | 0,029196454  | -0,041570521 |
| YKL186C_2 | MTR2: poly(A)+ mRNA-nucleus export                              | -0,136919971 | 0,032699758  | 0,000568213  |
| YKL186C_3 | MTR2: poly(A)+ mRNA-nucleus export                              | -0,136919971 | 0,03612347   | 0,137747431  |
| YKL186C_4 | MTR2: poly(A)+ mRNA-nucleus export                              | -0,136919971 | -0,130711491 | 0,178653729  |
| YKL186C_5 | MTR2: poly(A)+ mRNA-nucleus export                              | -0,136919971 | 0,012731491  | 0,033598608  |
| YKL186C_6 | MTR2: poly(A)+ mRNA-nucleus export                              | -0,136919971 | 0,019450659  | 0,102628481  |

|           |                                              |              |              |              |
|-----------|----------------------------------------------|--------------|--------------|--------------|
| YKL190W   | CNB1: cell wall organization and biogenesis  | -0,156444929 | 0,015021153  | 0,060857471  |
| YKR057W   | RPS21A: protein biosynthesis                 | -0,316770373 | -0,068338312 | -0,201149611 |
| YKR094C   | RPL40B: protein biosynthesis                 | -0,194008711 | -0,008305486 | -0,20300148  |
| YLL050C   | COF1: actin filament organization            | -0,247352476 | -0,054575289 | 0,260690151  |
| YLR048W   | RPS0B: protein biosynthesis                  | -0,208874599 | 0,013337137  | -0,141314211 |
| YLR061W   | RPL22A: protein biosynthesis                 | -0,289160947 | 0,144577879  | -0,175018227 |
| YLR078C   | BOS1: ER to Golgi transport                  | -0,14352168  | 0,041546687  | -0,039844558 |
| YLR093C   | NYV1: vesicle fusion                         | 0,101608134  | 0,134047997  | -0,005869866 |
| YLR128W   | DCN1: protein neddylation                    | 0,113959944  | 0,252650455  | 0,260023466  |
| YLR185W   | RPL37A: protein biosynthesis                 | -0,257871564 | -0,105937339 | -0,356967571 |
| YLR211C   | YLR211C: biological process unknown          | 0,001182316  | 0,048209075  | 0,010656979  |
| YLR275W   | SMD2: nuclear mRNA splicing, via spliceosome | -0,010877107 | -0,114678107 | -0,589106875 |
| YLR287C-A | RPS30A: protein biosynthesis                 | 0,420854835  | -0,277024577 | -0,141569361 |
| YLR306W   | UBC12: protein monoubiquitination            | 0,036632544  | 0,222725611  | -0,074490119 |
| YLR316C   | TAD3: tRNA modification                      | 0,134483461  | 0,041180082  | -0,048538599 |
| YLR316C_2 | TAD3: tRNA modification                      | 0,134483461  | 0,17717076   | 0,025145557  |
| YLR333C   | RPS25B: protein biosynthesis                 | -0,330687115 | -0,059298985 | -0,162705952 |
| YLR344W   | RPL26A: protein biosynthesis                 | -0,298491954 | -0,095278316 | 0,420781292  |
| YLR367W   | RPS22B: protein biosynthesis                 | 0,200386855  | 0,196613381  | 0,075721844  |
| YLR367W_2 | RPS22B: protein biosynthesis                 | 0,200386855  | 0,074168735  | -0,010867023 |
| YLR388W   | RPS29A: protein biosynthesis                 | -0,146692764 | 0,01168338   | -0,374288382 |
| YLR406C   | RPL31B: protein biosynthesis                 | -0,371014069 | -0,032577891 | -0,637062533 |
| YLR426W   | YLR426W: biological process unknown          | 0,065496342  | 0,113222886  | -0,026166361 |
| YLR448W   | RPL6B: protein biosynthesis                  | -0,422506516 | -0,093616237 | -0,391890363 |
| YML024W   | RPS17A: protein biosynthesis                 | -0,043737145 | -0,235599929 | -0,325054516 |
| YML025C   | YML6: protein biosynthesis                   | 0,065773944  | 0,225432344  | -0,060472659 |
| YML026C   | RPS18B: protein biosynthesis                 | -0,149351967 | -0,114585042 | -0,267115824 |
| YML034W   | SRC1: mitotic sister chromatid segregation   | 0,396429054  | 0,279111499  | -0,033185413 |
| YML034W_2 | SRC1: mitotic sister chromatid segregation   | 0,396429054  | 0,191070917  | 0,099788941  |
| YML056C   | IMD4: biological process unknown             | -0,011998119 | 0,389854692  | -0,095737718 |

|         |                                                           |              |              |              |
|---------|-----------------------------------------------------------|--------------|--------------|--------------|
| YML067C | ERV41: ER to Golgi transport                              | -0,046079453 | 0,049063943  | -0,320693644 |
| YML073C | RPL6A: protein biosynthesis                               | -0,325931707 | -0,077285324 | -0,230190183 |
| YML085C | TUB1: mitotic sister chromatid segregation                | -0,044035907 | -0,075566511 | 0,02906762   |
| YML094W | GIM5: tubulin folding                                     | 0,021570528  | 0,058383986  | -0,157705025 |
| YML124C | TUB3: mitotic sister chromatid segregation                | 0,044187712  | 0,218599232  | 0,035902084  |
| YMR033W | ARP9: chromatin remodeling                                | 0,206784681  | 0,273728512  | 0,040049623  |
| YMR079W | SEC14: sporulation (sensu Fungi)                          | -0,064857429 | 0,090245731  | -0,005638476 |
| YMR116C | ASC1: biological process unknown                          | -0,302347911 | 0,282864973  | -0,310941984 |
| YMR125W | STO1: nuclear mRNA splicing, via spliceosome              | 0,260681944  | 0,200969948  | 0,13677097   |
| YMR133W | REC114: meiotic recombination                             | -0,002275969 | -0,037049588 | -0,010373262 |
| YMR142C | RPL13B: protein biosynthesis                              | -0,412415567 | -0,279924292 | -0,367445838 |
| YMR143W | RPS16A: protein biosynthesis                              | -0,443150772 | -0,199404205 | -0,28802686  |
| YMR194W | RPL36A: protein biosynthesis                              | -0,090232699 | -0,056322671 | -0,200890034 |
| YMR201C | RAD14: nucleotide-excision repair, DNA damage recognition | 0,077552565  | 0,21362246   | 0,080116059  |
| YMR225C | MRPL44: protein biosynthesis                              | -0,022084739 | 0,235779198  | -0,05270847  |
| YMR230W | RPS10B: protein biosynthesis                              | -0,268688614 | -0,074116765 | -0,250840735 |
| YMR292W | GOT1: ER to Golgi transport                               | -0,18508454  | 0,192013909  | -0,070969959 |
| YNL012W | SPO1: meiosis                                             | 0,049350907  | -0,020328333 | 0,027190952  |
| YNL044W | YIP3: ER to Golgi transport                               | 0,453403524  | 0,299572237  | -0,162777126 |
| YNL050C | YNL050C: biological process unknown                       | 0,086234977  | -0,087851389 | -0,017376709 |
| YNL069C | RPL16B: protein biosynthesis                              | -0,09125503  | 0,109388377  | 0,064083445  |
| YNL096C | RPS7B: protein biosynthesis                               | -0,202724971 | 0,081128399  | -0,385805331 |
| YNL112W | DBP2: mRNA catabolism, nonsense-mediated decay            | -0,09491678  | 0,168169964  | -0,122729502 |
| YNL130C | CPT1: phosphatidylcholine biosynthesis                    | -0,009297224 | 0,180149537  | -0,025259842 |
| YNL147W | LSM7: nuclear mRNA splicing, via spliceosome              | 0,035852421  | 0,134941764  | -0,044847111 |
| YNL162W | RPL42A: protein biosynthesis                              | -0,199472281 | -0,252107334 | -0,323167425 |
| YNL246W | VPS75: protein-vacuolar targeting                         | 0,121335601  | 0,054168825  | -0,123052727 |
| YNL265C | IST1: protein biosynthesis                                | 0,155878728  | 0,050436773  | -0,118982949 |
| YNL301C | RPL18B: protein biosynthesis                              | -0,150537954 | -0,329689157 | 0,043513514  |
| YNL302C | RPS19B: protein biosynthesis                              | -0,401116764 | -0,341838799 | -0,279517207 |

|           |                                                                     |              |              |              |
|-----------|---------------------------------------------------------------------|--------------|--------------|--------------|
| YNL312W   | RFA2: DNA recombination                                             | 0,015660161  | 0,041239373  | 0,026318188  |
| YNR053C   | NOG2: ribosome assembly                                             | 0,148017916  | 0,372780028  | 0,031252891  |
| YOL047C   | YOL047C: biological process unknown                                 | 0,120794867  | 0,133446021  | 0,007706455  |
| YOL048C   | YOL048C: biological process unknown                                 | 0,196949696  | 0,075208325  | 0,133255191  |
| YOL120C   | RPL18A: protein biosynthesis                                        | -0,469560929 | -0,46309681  | -0,044387819 |
| YOL121C   | RPS19A: protein biosynthesis                                        | -0,303291904 | 0,066885611  | 0,227968971  |
| YOL127W   | RPL25: protein biosynthesis                                         | -0,409930398 | -0,07829018  | -0,407171159 |
| YOR096W   | RPS7A: protein biosynthesis                                         | -0,131711493 | -0,162966371 | -0,252978785 |
| YOR122C   | PFY1: response to osmotic stress                                    | 0,061493299  | 0,316592939  | -0,033939209 |
| YOR182C   | RPS30B: protein biosynthesis                                        | 0,184563005  | -0,071160542 | -0,076847137 |
| YOR234C   | RPL33B: protein biosynthesis                                        | -0,092636687 | 0,106501876  | -0,008251032 |
| YOR293W   | RPS10A: protein biosynthesis                                        | -0,258223019 | 0,07863109   | -0,181006143 |
| YOR312C   | RPL20B: protein biosynthesis                                        | -0,393196105 | -0,516393961 | -0,398218219 |
| YPL031C   | PHO85: protein amino acid phosphorylation                           | -0,192945824 | 0,094582421  | -0,231638901 |
| YPL075W   | GCR1: positive regulation of transcription from RNA polymerase II ] | 0,051448227  | -0,12325667  | 0,009172164  |
| YPL079W   | RPL21B: protein biosynthesis                                        | -0,231716686 | -0,097987503 | 0,023242071  |
| YPL081W   | RPS9A: protein biosynthesis                                         | -0,108003489 | 0,051178644  | -0,061136556 |
| YPL090C   | RPS6A: protein biosynthesis                                         | -0,162793232 | -0,069786529 | -0,361691746 |
| YPL129W   | TAF14: chromatin remodeling                                         | -0,141061245 | -0,219927243 | -0,025023623 |
| YPL143W   | RPL33A: protein biosynthesis                                        | -0,273012379 | -0,276845304 | 0,120630661  |
| YPL175W   | SPT14: GPI anchor biosynthesis                                      | -0,257187158 | -0,14043484  | 0,173970377  |
| YPL198W   | RPL7B: protein biosynthesis                                         | -0,161574608 | 0,176808373  | -0,057186457 |
| YPL198W_2 | RPL7B: protein biosynthesis                                         | -0,161574608 | 0,190577861  | -0,19102129  |
| YPL218W   | SAR1: ER to Golgi transport                                         | -0,032495154 | 0,204890077  | -0,061341475 |
| YPL241C   | CIN2: microtubule-based process                                     | 0,091687674  | -0,057702964 | 0,122007489  |
| YPL249C-A | RPL36B: protein biosynthesis                                        | -0,399606573 | -0,088399739 | -0,180609451 |
| YPR028W   | YOP1: vesicle-mediated transport                                    | -0,127075493 | 0,476678939  | 0,049871239  |
| YPR043W   | RPL43A: protein biosynthesis                                        | -0,408916766 | -0,271724709 | -0,307638641 |
| YPR063C   | YPR063C: biological process unknown                                 | -0,436869457 | 0,21341946   | -0,701044666 |
| YPR098C   | YPR098C: biological process unknown                                 | -0,014619757 | 0,492965376  | -0,041704585 |

|         |                                                      |              |              |              |
|---------|------------------------------------------------------|--------------|--------------|--------------|
| YPR132W | RPS23B: protein biosynthesis                         | -0,005199764 | -0,031749198 | -0,414453006 |
| YPR187W | RPO26: transcription from RNA polymerase II promoter | -0,027199607 | 0,1268478    | 0,064732477  |

Genotype:

Strains compared:

Feature:

|                      |                      |                      |
|----------------------|----------------------|----------------------|
| <i>set1Δ</i>         | <i>set1Δ</i>         | <i>set1Δ</i>         |
| W303 <i>set1Δ</i> vs | W303 <i>set1Δ</i> vs | W303 <i>set1Δ</i> vs |
| W303                 | W303                 | W303                 |
| Exon                 | Intron               | Junction             |

| Systematic Name | Common Name                                                     |              |              |              |
|-----------------|-----------------------------------------------------------------|--------------|--------------|--------------|
| SNR17A          | SNR17A                                                          | 0,197678103  | 0,366134636  | 0,363915327  |
| SNR17B          | SNR17B                                                          | 0,157475607  | 0,434131696  | 0,363915327  |
| YAL001C         | TFC3: transcription initiation from RNA polymerase III promoter | 0,198053274  | 0,048591336  | 0,037155555  |
| YAL003W         | EFB1: translational elongation                                  | -0,403082333 | 0,239880352  | -0,13814561  |
| YAL030W         | SNC1: endocytosis                                               | 0,017656027  | -0,040981588 | 0,148775282  |
| YBL018C         | POP8: rRNA processing                                           | -0,123329223 | -0,262793156 | -0,079708912 |
| YBL026W         | LSM2: nuclear mRNA splicing, via spliceosome                    | 0,081403196  | 0,222408935  | 0,07153594   |
| YBL027W         | RPL19B: protein biosynthesis                                    | -0,446358813 | 0,04749079   | 0,185561632  |
| YBL040C         | ERD2: protein retention in ER                                   | 0,072192981  | 0,121066528  | -0,121193426 |
| YBL050W         | SEC17: ER to Golgi transport                                    | -0,159654535 | 0,154414037  | -0,150980358 |
| YBL059C-A       | YBL059C-A: biological process unknown                           | -0,05871412  | -0,059074441 | -0,141462426 |
| YBL059W         | YBL059W: biological process unknown                             | 0,060917672  | -0,041707288 | -0,088971325 |
| YBL072C         | RPS8A: protein biosynthesis                                     | -0,213852796 | 0,149321922  | -0,158955808 |
| YBL087C         | RPL23A: protein biosynthesis                                    | -0,282204392 | 0,15213857   | -0,336129704 |
| YBL091C-A       | SCS22: biological process unknown                               | -0,072879607 | 0,422830454  | 0,009705717  |
| YBL092W         | RPL32: protein biosynthesis                                     | 0,017133483  | -0,080457648 | -0,268946597 |
| YBR048W         | RPS11B: protein biosynthesis                                    | -0,06506507  | 0,092557598  | -0,104049499 |
| YBR078W         | ECM33: cell wall organization and biogenesis                    | 0,164212183  | 0,668086782  | 0,315077495  |
| YBR082C         | UBC4: response to stress                                        | 0,173979101  | 0,044063246  | -0,071096143 |

|           |                                                                  |              |              |              |
|-----------|------------------------------------------------------------------|--------------|--------------|--------------|
| YBR084C-A | RPL19A: protein biosynthesis                                     | -0,128367571 | 0,003626174  | 0,100252191  |
| YBR089C-A | NHP6B: regulation of transcription from RNA polymerase II promot | 0,023833399  | -0,020766341 | 0,231217614  |
| YBR119W   | MUD1: nuclear mRNA splicing, via spliceosome                     | -0,306619124 | 0,031781606  | -0,026079388 |
| YBR181C   | RPS6B: protein biosynthesis                                      | -0,083486497 | -0,059928236 | -0,555320938 |
| YBR186W   | PCH2: regulation of meiosis                                      | 0,419694192  | -0,104837764 | 0,467024864  |
| YBR189W   | RPS9B: protein biosynthesis                                      | -0,303079668 | 0,079859054  | -0,278499582 |
| YBR191W   | RPL21A: protein biosynthesis                                     | -0,102300045 | 0,029370606  | 0,003879928  |
| YBR219C   | YBR219C: biological process unknown                              | 0,091683605  | -0,153275193 | 0,102128593  |
| YBR230C   | YBR230C: biological process unknown                              | -0,156957689 | 0,114343741  | -0,203194569 |
| YCR028C-A | RIM1: mitochondrial genome maintenance                           | -0,223600925 | 0,115804936  | -0,217127866 |
| YCR031C   | RPS14A: protein biosynthesis                                     | 0,230967428  | -0,110252352 | -0,44793901  |
| YCR097W   | HMRA1: regulation of transcription, mating-type specific         | 0,031171325  | -0,245626962 | 0,192482033  |
| YCR097W_2 | HMRA1: regulation of transcription, mating-type specific         | 0,031171325  | 0,017171794  | 0,31174947   |
| YDL012C   | YDL012C: biological process unknown                              | 0,131806307  | 0,237918949  | 0,300287053  |
| YDL029W   | ARP2: actin filament organization                                | -0,311326487 | 0,103634022  | 0,010325526  |
| YDL061C   | RPS29B: protein biosynthesis                                     | 0,312780751  | -0,010624818 | 0,054580116  |
| YDL064W   | UBC9: G2/M transition of mitotic cell cycle                      | -0,064772725 | -0,030699814 | 0,207088024  |
| YDL075W   | RPL31A: protein biosynthesis                                     | -0,338444839 | -0,248283428 | -0,509138911 |
| YDL079C   | MRK1: protein amino acid phosphorylation                         | 0,044377767  | -0,161377786 | 0,014594704  |
| YDL082W   | RPL13A: protein biosynthesis                                     | -0,092411182 | -0,231747212 | 0,029760003  |
| YDL083C   | RPS16B: protein biosynthesis                                     | -0,286718345 | -0,072218542 | -0,114078315 |
| YDL108W   | KIN28: protein amino acid phosphorylation                        | 0,05670332   | -0,146329565 | 0,200464402  |
| YDL115C   | IWR1: meiosis                                                    | 0,136027776  | 0,043787647  | 0,164392342  |
| YDL125C   | HNT1: nucleotide metabolism                                      | 0,286169071  | 0,587605087  | -0,078969466 |
| YDL130W   | RPP1B: translational elongation                                  | 0,144432259  | -0,049249679 | -0,147707316 |
| YDL136W   | RPL35B: protein biosynthesis                                     | -0,24729918  | -0,183963772 | -0,035032457 |
| YDL137W   | ARF2: ER to Golgi transport                                      | -0,177959321 | 0,296578165  | -0,490412597 |
| YDL189W   | RBS1: galactose metabolism                                       | -0,01793081  | -0,136142403 | -0,005040698 |
| YDL191W   | RPL35A: protein biosynthesis                                     | -0,119651815 | 0,07545395   | -0,001050748 |
| YDL219W   | DTD1: translation                                                | -0,164344405 | 0,113113477  | -0,282483038 |

|             |                                                                   |              |              |              |
|-------------|-------------------------------------------------------------------|--------------|--------------|--------------|
| YDR005C     | MAF1: negative regulation of transcription from RNA polymerase II | -0,058697231 | 0,166070367  | 0,024615238  |
| YDR025W     | RPS11A: protein biosynthesis                                      | 0,244092215  | 0,027965795  | -0,051877743 |
| YDR059C     | UBC5: endocytosis                                                 | 0,482132968  | 0,023147253  | -0,031997036 |
| YDR064W     | RPS13: protein biosynthesis                                       | -0,360055802 | -0,382944061 | -0,474889835 |
| YDR092W     | UBC13: protein monoubiquitination                                 | 0,018387636  | 0,219902878  | -0,00322117  |
| YDR129C     | SAC6: endocytosis                                                 | -0,252632533 | 0,09873979   | 0,120698335  |
| YDR139C     | RUB1: protein deneddylation                                       | 0,406423068  | -0,098768759 | -0,042235706 |
| YDR305C     | HNT2: nucleoside catabolism                                       | 0,114157046  | -0,055072488 | -0,229680878 |
| YDR367W     | YDR367W: biological process unknown                               | -0,122194667 | -0,103846234 | -0,047365496 |
| YDR381W     | YRA1: mRNA-nucleus export                                         | 0,017598738  | 0,079214393  | -0,317363951 |
| YDR397C     | NCB2: negative regulation of transcription from RNA polymerase II | -0,144795323 | -0,113921577 | 0,220222184  |
| YDR424C     | DYN2: microtubule-based process                                   | 0,140621493  | 0,273993889  | 0,14576819   |
| YDR424C_2   | DYN2: microtubule-based process                                   | 0,140621493  | 0,073664737  | 0,106816793  |
| YDR447C     | RPS17B: protein biosynthesis                                      | -0,032423913 | -0,005956276 | -0,206356443 |
| YDR450W     | RPS18A: protein biosynthesis                                      | -0,232594203 | 0,034475454  | 0,133242115  |
| YDR471W     | RPL27B: protein biosynthesis                                      | -0,144534965 | -0,020657812 | -0,166820805 |
| YDR500C     | RPL37B: protein biosynthesis                                      | -0,014258244 | -0,04240468  | -0,040868318 |
| YEL012W     | UBC8: protein monoubiquitination                                  | 0,207939155  | -0,079353129 | 0,078128766  |
| YER003C     | PMI40: protein amino acid glycosylation                           | 0,102173085  | 0,069896137  | 0,408089012  |
| YER007C-A   | RBF20: biological process unknown                                 | -0,293239191 | -0,182999682 | -0,369953115 |
| YER044C-A   | MEI4: sporulation (sensu Fungi)                                   | -0,051266132 | -0,120623688 | 0,04536331   |
| YER056C-A   | RPL34A: protein biosynthesis                                      | -0,203890741 | 0,233979482  | 0,037047131  |
| YER074W     | RPS24A: protein biosynthesis                                      | 0,004963889  | 0,166410082  | -0,106381825 |
| YER074W-A   | YOS1: ER to Golgi transport                                       | -0,201211607 | 0,01221744   | 0,004934393  |
| YER074W-A_2 | YOS1: ER to Golgi transport                                       | -0,201211607 | -0,007805203 | -0,029607077 |
| YER093C-A   | YER093C-A: biological process unknown                             | -0,127056976 | 0,128037272  | -0,059578998 |
| YER102W     | RPS8B: protein biosynthesis                                       | -0,025076171 | -0,000960958 | -0,000796998 |
| YER117W     | RPL23B: protein biosynthesis                                      | -0,1671257   | -0,136645214 | 0,029442488  |
| YER131W     | RPS26B: protein biosynthesis                                      | 0,066654471  | 0,039499518  | 0,268864978  |
| YER133W     | GLC7: 35S primary transcript processing                           | 0,022199037  | 0,365694361  | -0,181104715 |



|           |                                                 |              |              |              |
|-----------|-------------------------------------------------|--------------|--------------|--------------|
| YER179W   | DMC1: meiosis                                   | 0,158714553  | -0,341176962 | 0,297640966  |
| YFL034C-A | RPL22B: protein biosynthesis                    | 0,10153239   | 0,141911511  | 0,019605646  |
| YFL034C-B | MOB2: protein amino acid phosphorylation        | 0,153951677  | 0,198721238  | 0,0353909    |
| YFL039C   | ACT1: cell wall organization and biogenesis     | 0,3297276    | 0,219402303  | 0,264135326  |
| YFR024C-A | LSB3: actin filament organization               | 0,107946716  | -0,104070721 | 0,20562296   |
| YFR031C-A | RPL2A: protein biosynthesis                     | 0,015116962  | 0,21336488   | -0,103386988 |
| YFR032C-A | RPL29: protein biosynthesis                     | -0,130912646 | 0,283757553  | -0,201747866 |
| YGL030W   | RPL30: protein biosynthesis                     | -0,021645238 | -0,077898757 | -0,260954234 |
| YGL031C   | RPL24A: protein biosynthesis                    | -0,341174902 | 0,120625429  | 0,103987177  |
| YGL033W   | HOP2: synapsis                                  | 0,628310631  | 0,409384225  | 0,093291164  |
| YGL076C   | RPL7A: protein biosynthesis                     | 0,076622952  | 0,116719254  | -0,059162911 |
| YGL076C_2 | RPL7A: protein biosynthesis                     | 0,076622952  | 0,216427061  | -0,120924528 |
| YGL087C   | MMS2: DNA repair                                | 0,27238546   | -0,069992449 | 0,220014897  |
| YGL103W   | RPL28: protein biosynthesis                     | -0,015256478 | -0,028465305 | 0,00281107   |
| YGL137W   | SEC27: ER to Golgi transport                    | -0,17333038  | -0,031550414 | -0,399077442 |
| YGL178W   | MPT5: cell wall organization and biogenesis     | 0,257582385  | 0,232122417  | 0,52716317   |
| YGL187C   | COX4: aerobic respiration                       | -0,036016152 | -0,10857019  | 0,151819668  |
| YGL189C   | RPS26A: protein biosynthesis                    | -0,124294234 | 0,282792476  | 0,760776797  |
| YGL226C-A | OST5: protein amino acid N-linked glycosylation | -0,181453669 | -0,05752587  | 0,08345953   |
| YGL232W   | TAN1: tRNA modification                         | 0,012310726  | 0,102364197  | -0,161861149 |
| YGL251C   | HFM1: meiosis                                   | -0,220755662 | -0,130259941 | -0,069310179 |
| YGR001C   | YGR001C: biological process unknown             | -0,360674024 | -0,108840044 | -0,209766731 |
| YGR001C_2 | YGR001C: biological process unknown             | -0,360674024 | -0,164179391 | -0,659829307 |
| YGR027C   | RPS25A: protein biosynthesis                    | -0,289333207 | 0,100311506  | 0,051209413  |
| YGR029W   | ERV1: mitochondrion organization and biogenesis | -0,186444333 | -0,033579561 | 0,016793298  |
| YGR118W   | RPS23A: protein biosynthesis                    | -0,217815832 | -0,052397804 | 0,093016913  |
| YGR148C   | RPL24B: protein biosynthesis                    | -0,243949989 | 0,192937201  | -0,272377151 |
| YGR183C   | QCR9: aerobic respiration                       | 0,160267889  | 0,150808298  | 0,055137059  |
| YGR214W   | RPS0A: protein biosynthesis                     | -0,023554448 | -0,034882493 | -0,031864084 |
| YGR225W   | AMA1: sporulation (sensu Fungi)                 | 0,103012914  | 0,292076579  | 0,067172973  |

|           |                                                                 |              |              |              |
|-----------|-----------------------------------------------------------------|--------------|--------------|--------------|
| YHL001W   | RPL14B: protein biosynthesis                                    | -0,250200183 | 0,136937978  | -0,045259459 |
| YHR001W-A | QCR10: aerobic respiration                                      | 0,535789519  | -0,091484728 | 0,090132198  |
| YHR010W   | RPL27A: protein biosynthesis                                    | 0,081133185  | 0,176589354  | 0,106454037  |
| YHR012W   | VPS29: retrograde transport, endosome to Golgi                  | -0,157693071 | -0,140882775 | 0,085919511  |
| YHR016C   | YSC84: endocytosis                                              | 0,08911571   | 0,193283404  | 0,169083269  |
| YHR021C   | RPS27B: protein biosynthesis                                    | 0,055867219  | 0,064834998  | -0,032255949 |
| YHR039C-A | VMA10: vacuolar acidification                                   | -0,155045877 | 0,077343402  | -0,169718636 |
| YHR041C   | SRB2: transcription from RNA polymerase II promoter             | 0,016589983  | 0,108458654  | 0,052748906  |
| YHR077C   | NMD2: mRNA catabolism                                           | 0,014956196  | -0,194984858 | 0,210443668  |
| YHR097C   | YHR097C: biological process unknown                             | 0,359450514  | 0,248262014  | 0,074995948  |
| YHR101C   | BIG1: cell wall biosynthesis (sensu Fungi)                      | -0,070221082 | -0,041682746 | 0,192197648  |
| YHR123W   | EPT1: phosphatidylethanolamine biosynthesis                     | -0,312426127 | 0,003945712  | -0,477405152 |
| YHR141C   | RPL42B: protein biosynthesis                                    | -0,163359241 | -0,010617813 | -0,182953069 |
| YHR203C   | RPS4B: protein biosynthesis                                     | -0,027435739 | -0,059901355 | -0,081599181 |
| YIL004C   | BET1: ER to Golgi transport                                     | -0,173321897 | -0,207580706 | -0,061363296 |
| YIL018W   | RPL2B: protein biosynthesis                                     | -0,018001426 | 0,140906255  | -0,00923819  |
| YIL052C   | RPL34B: protein biosynthesis                                    | 0,058236246  | 0,079003582  | 0,040306751  |
| YIL069C   | RPS24B: protein biosynthesis                                    | 0,032337523  | -0,111223543 | -0,269682785 |
| YIL106W   | MOB1: protein amino acid phosphorylation                        | 0,227128622  | 0,217308281  | 0,438537737  |
| YIL111W   | COX5B: mitochondrial electron transport, cytochrome c to oxygen | 0,016160513  | -0,022530418 | -0,188639307 |
| YIL133C   | RPL16A: protein biosynthesis                                    | 0,374221046  | -0,092071456 | 0,136315382  |
| YIL148W   | RPL40A: protein biosynthesis                                    | -0,049321182 | -0,17868769  | -0,23950284  |
| YJL001W   | PRE3: response to stress                                        | -0,136872482 | 0,076177513  | -0,093617543 |
| YJL024C   | APS3: vesicle-mediated transport                                | -0,254182622 | -0,028985773 | 0,073137015  |
| YJL041W   | NSP1: mRNA-nucleus export                                       | 0,067444511  | 0,246695689  | 0,326259831  |
| YJL136C   | RPS21B: protein biosynthesis                                    | -0,155948347 | -0,074639246 | -0,045973142 |
| YJL177W   | RPL17B: protein biosynthesis                                    | -0,139043959 | -0,109768188 | 0,011576646  |
| YJL189W   | RPL39: protein biosynthesis                                     | -0,111646037 | -0,002898734 | -0,016518733 |
| YJL191W   | RPS14B: protein biosynthesis                                    | 0,424487315  | 0,089095116  | 0,267286414  |
| YJL205C   | NCE1: biological process unknown                                | 0,029231168  | 0,19839181   | 0,048702453  |

|           |                                              |              |              |              |
|-----------|----------------------------------------------|--------------|--------------|--------------|
| YJR021C   | REC107: meiotic recombination                | 0,220873834  | 0,081966152  | 0,139409662  |
| YJR094W-A | RPL43B: protein biosynthesis                 | 0,214700051  | 0,12972512   | 0,132480478  |
| YJR145C   | RPS4A: protein biosynthesis                  | -0,353961555 | 0,021332198  | -0,17025924  |
| YKL002W   | DID4: protein retention in Golgi             | -0,063019626 | -0,144306816 | 0,136719788  |
| YKL006C-A | SFT1: intra-Golgi transport                  | -0,112444776 | 0,006699636  | 0,079153816  |
| YKL006W   | RPL14A: protein biosynthesis                 | 0,012419857  | 0,149657792  | -0,016597235 |
| YKL081W   | TEF4: translational elongation               | 0,225570903  | 0,097199652  | 0,259001926  |
| YKL156W   | RPS27A: protein biosynthesis                 | 0,062374453  | 0,064822059  | -0,151326759 |
| YKL157W   | APE2: peptide metabolism                     | 0,18634009   | -0,610981821 | 0,048401752  |
| YKL180W   | RPL17A: protein biosynthesis                 | -0,259010296 | 0,031286508  | -0,388125158 |
| YKL186C   | MTR2: poly(A)+ mRNA-nucleus export           | -0,131103132 | -0,053739445 | -0,116836018 |
| YKL186C_2 | MTR2: poly(A)+ mRNA-nucleus export           | -0,131103132 | -0,08691001  | 0,10872715   |
| YKL186C_3 | MTR2: poly(A)+ mRNA-nucleus export           | -0,131103132 | -0,060871118 | -0,014639836 |
| YKL186C_4 | MTR2: poly(A)+ mRNA-nucleus export           | -0,131103132 | -0,082304137 | 0,222240532  |
| YKL186C_5 | MTR2: poly(A)+ mRNA-nucleus export           | -0,131103132 | -0,137477945 | 0,042451414  |
| YKL186C_6 | MTR2: poly(A)+ mRNA-nucleus export           | -0,131103132 | 0,028412258  | -0,049620407 |
| YKL190W   | CNB1: cell wall organization and biogenesis  | -0,230584996 | -0,051558138 | -0,03425145  |
| YKR057W   | RPS21A: protein biosynthesis                 | -0,387684661 | 0,088275829  | -0,157735097 |
| YKR094C   | RPL40B: protein biosynthesis                 | -0,025471893 | -0,210424693 | 0,031707345  |
| YLL050C   | COF1: actin filament organization            | -0,412207162 | 0,012496669  | 0,432516927  |
| YLR048W   | RPS0B: protein biosynthesis                  | 0,080405886  | 0,042159257  | 0,144257557  |
| YLR061W   | RPL22A: protein biosynthesis                 | -0,003349876 | 0,231290049  | 0,097871036  |
| YLR078C   | BOS1: ER to Golgi transport                  | -0,266450477 | -0,132418072 | 0,068243847  |
| YLR093C   | NYV1: vesicle fusion                         | -0,112240851 | 0,096472663  | -0,186550775 |
| YLR128W   | DCN1: protein neddylation                    | 0,002792523  | 0,293605151  | -0,02449166  |
| YLR185W   | RPL37A: protein biosynthesis                 | -0,049713597 | -0,041559832 | -0,231081115 |
| YLR211C   | YLR211C: biological process unknown          | 0,019207922  | -0,063863223 | -0,051172349 |
| YLR275W   | SMD2: nuclear mRNA splicing, via spliceosome | -0,083803451 | -0,010941132 | 2,190639048  |
| YLR287C-A | RPS30A: protein biosynthesis                 | 0,399449212  | -0,173799039 | -0,004499621 |
| YLR306W   | UBC12: protein monoubiquitination            | -0,017905752 | 0,095136099  | 0,006553045  |

|           |                                                           |              |              |              |
|-----------|-----------------------------------------------------------|--------------|--------------|--------------|
| YLR316C   | TAD3: tRNA modification                                   | 0,149412408  | -0,149358651 | 0,271407175  |
| YLR316C_2 | TAD3: tRNA modification                                   | 0,149412408  | -0,166590681 | -0,020981802 |
| YLR333C   | RPS25B: protein biosynthesis                              | -0,226084459 | -0,067377016 | -0,057570419 |
| YLR344W   | RPL26A: protein biosynthesis                              | -0,280853443 | 0,025025627  | -0,004055588 |
| YLR367W   | RPS22B: protein biosynthesis                              | 0,230235625  | 0,146274495  | -0,133466947 |
| YLR367W_2 | RPS22B: protein biosynthesis                              | 0,230235625  | -0,288701002 | 0,139671868  |
| YLR388W   | RPS29A: protein biosynthesis                              | -0,195411853 | -0,088257503 | -0,154950591 |
| YLR406C   | RPL31B: protein biosynthesis                              | -0,270174443 | -0,026275296 | -0,313056961 |
| YLR426W   | YLR426W: biological process unknown                       | 0,027998716  | 0,169057673  | -0,174023315 |
| YLR448W   | RPL6B: protein biosynthesis                               | -0,353233492 | 0,003847758  | -0,306359412 |
| YML024W   | RPS17A: protein biosynthesis                              | -0,416670472 | 0,048485861  | -0,250874401 |
| YML025C   | YML6: protein biosynthesis                                | 0,033227168  | -0,048680903 | -0,037632138 |
| YML026C   | RPS18B: protein biosynthesis                              | -0,014258821 | 0,027518438  | -0,154560048 |
| YML034W   | SRC1: mitotic sister chromatid segregation                | 0,104853359  | -0,069531574 | 0,028363806  |
| YML034W_2 | SRC1: mitotic sister chromatid segregation                | 0,104853359  | -0,099127384 | 0,128167573  |
| YML056C   | IMD4: biological process unknown                          | -0,235154839 | 0,177778769  | -0,34600952  |
| YML067C   | ERV41: ER to Golgi transport                              | -0,226820686 | -0,157134737 | -0,565738554 |
| YML073C   | RPL6A: protein biosynthesis                               | -0,284512367 | 0,048565004  | -0,425014772 |
| YML085C   | TUB1: mitotic sister chromatid segregation                | 0,027532741  | 0,011023156  | -0,143016452 |
| YML094W   | GIM5: tubulin folding                                     | -0,061815997 | -0,128743561 | -0,12500357  |
| YML124C   | TUB3: mitotic sister chromatid segregation                | 0,306225763  | 0,083417522  | -0,069991556 |
| YMR033W   | ARP9: chromatin remodeling                                | 0,117638222  | -0,038407743 | -0,196784734 |
| YMR079W   | SEC14: sporulation (sensu Fungi)                          | 0,141631967  | -0,099246422 | 0,043498617  |
| YMR116C   | ASC1: biological process unknown                          | -0,030271177 | 0,093124162  | 0,020023902  |
| YMR125W   | STO1: nuclear mRNA splicing, via spliceosome              | 0,039477455  | -0,021326542 | 0,146783007  |
| YMR133W   | REC114: meiotic recombination                             | -0,006141121 | 0,037024641  | 0,204632862  |
| YMR142C   | RPL13B: protein biosynthesis                              | -0,39502383  | -0,073610585 | -0,409886478 |
| YMR143W   | RPS16A: protein biosynthesis                              | -0,034429846 | -0,120306751 | -0,246549112 |
| YMR194W   | RPL36A: protein biosynthesis                              | -0,081613943 | 0,082567591  | -0,168750853 |
| YMR201C   | RAD14: nucleotide-excision repair, DNA damage recognition | -0,130736011 | -0,106844434 | -0,060093896 |

|         |                                                |              |              |              |
|---------|------------------------------------------------|--------------|--------------|--------------|
| YMR225C | MRPL44: protein biosynthesis                   | -0,138655486 | 0,101058583  | -0,108274354 |
| YMR230W | RPS10B: protein biosynthesis                   | -0,182267899 | -0,034422629 | -0,249445204 |
| YMR292W | GOT1: ER to Golgi transport                    | -0,038659879 | 0,00572857   | -0,108432453 |
| YNL012W | SPO1: meiosis                                  | -0,047066699 | -0,204510059 | -0,176185218 |
| YNL044W | YIP3: ER to Golgi transport                    | 0,186621009  | 0,190634523  | -0,079164171 |
| YNL050C | YNL050C: biological process unknown            | 0,124625822  | -0,050054776 | -0,104658925 |
| YNL069C | RPL16B: protein biosynthesis                   | 0,110972302  | 0,131567163  | 0,1539242    |
| YNL096C | RPS7B: protein biosynthesis                    | 0,376115417  | 0,356461544  | 0,228074745  |
| YNL112W | DBP2: mRNA catabolism, nonsense-mediated decay | 0,172192763  | 0,47810543   | 0,082900563  |
| YNL130C | CPT1: phosphatidylcholine biosynthesis         | 0,157196266  | -0,102966843 | -0,006200541 |
| YNL147W | LSM7: nuclear mRNA splicing, via spliceosome   | -0,028357146 | -0,080606669 | 0,056168017  |
| YNL162W | RPL42A: protein biosynthesis                   | 0,029675557  | -0,187790527 | -0,413689217 |
| YNL246W | VPS75: protein-vacuolar targeting              | -0,053885516 | 0,049382849  | 0,056380119  |
| YNL265C | IST1: protein biosynthesis                     | -0,119750072 | 0,295016654  | -0,115044071 |
| YNL301C | RPL18B: protein biosynthesis                   | -0,081352927 | -0,142767771 | 0,006049504  |
| YNL302C | RPS19B: protein biosynthesis                   | -0,561474224 | 0,200984104  | -0,29325763  |
| YNL312W | RFA2: DNA recombination                        | 0,162549723  | 0,002696706  | 0,135842384  |
| YNR053C | NOG2: ribosome assembly                        | 0,358684178  | 0,978411768  | 0,14939881   |
| YOL047C | YOL047C: biological process unknown            | 0,52133722   | 0,188864579  | 0,410400099  |
| YOL048C | YOL048C: biological process unknown            | 0,028248936  | -0,047886582 | -0,043651918 |
| YOL120C | RPL18A: protein biosynthesis                   | -0,085249825 | -0,237999758 | 0,000684845  |
| YOL121C | RPS19A: protein biosynthesis                   | -0,135413668 | 0,162688543  | 0,191483511  |
| YOL127W | RPL25: protein biosynthesis                    | -0,215369099 | 0,113575067  | -0,086099377 |
| YOR096W | RPS7A: protein biosynthesis                    | -0,551081993 | 0,056673601  | -0,488638203 |
| YOR122C | PFY1: response to osmotic stress               | -0,117360469 | 0,003712806  | -0,028927615 |
| YOR182C | RPS30B: protein biosynthesis                   | -0,155351888 | -0,039603184 | -0,001608946 |
| YOR234C | RPL33B: protein biosynthesis                   | 0,164032592  | 0,050555375  | -0,019071277 |
| YOR293W | RPS10A: protein biosynthesis                   | -0,157100901 | 0,140098375  | -0,126238236 |
| YOR312C | RPL20B: protein biosynthesis                   | -0,166360295 | -0,164758832 | -0,242254789 |
| YPL031C | PHO85: protein amino acid phosphorylation      | 0,06674175   | 0,198651297  | -0,265553385 |

|           |                                                                     |              |              |              |
|-----------|---------------------------------------------------------------------|--------------|--------------|--------------|
| YPL075W   | GCR1: positive regulation of transcription from RNA polymerase II ] | -0,112873363 | -0,376567748 | 0,049949976  |
| YPL079W   | RPL21B: protein biosynthesis                                        | -0,027296548 | -0,00149601  | -0,121342827 |
| YPL081W   | RPS9A: protein biosynthesis                                         | 0,194746024  | -0,024418418 | 0,079423838  |
| YPL090C   | RPS6A: protein biosynthesis                                         | -0,390242719 | -0,16089062  | -0,372471952 |
| YPL129W   | TAF14: chromatin remodeling                                         | -0,220213948 | -0,165996381 | 0,056360621  |
| YPL143W   | RPL33A: protein biosynthesis                                        | -0,138066462 | 0,115977791  | -0,01502695  |
| YPL175W   | SPT14: GPI anchor biosynthesis                                      | 0,012786296  | -0,16001701  | -0,018318743 |
| YPL198W   | RPL7B: protein biosynthesis                                         | 0,31864225   | -0,004318114 | 0,135648439  |
| YPL198W_2 | RPL7B: protein biosynthesis                                         | 0,31864225   | 0,141214716  | 0,08640419   |
| YPL218W   | SAR1: ER to Golgi transport                                         | 0,172631397  | 0,1078415    | -0,125241107 |
| YPL241C   | CIN2: microtubule-based process                                     | 0,003125145  | -0,080859488 | 0,173144336  |
| YPL249C-A | RPL36B: protein biosynthesis                                        | -0,304636567 | 0,074714787  | -0,295881321 |
| YPR028W   | YOP1: vesicle-mediated transport                                    | -0,31515637  | 0,033176794  | 0,131735392  |
| YPR043W   | RPL43A: protein biosynthesis                                        | -0,238551767 | 0,140938558  | -0,250701476 |
| YPR063C   | YPR063C: biological process unknown                                 | -0,313458094 | 0,058945915  | -0,506260009 |
| YPR098C   | YPR098C: biological process unknown                                 | -0,191336941 | 0,071994088  | -0,110815157 |
| YPR132W   | RPS23B: protein biosynthesis                                        | -0,235462691 | -0,013740111 | -0,347694788 |
| YPR187W   | RPO26: transcription from RNA polymerase II promoter                | -0,055221332 | -0,175758111 | 0,128236102  |

Genotype:

|                      |                      |                      |
|----------------------|----------------------|----------------------|
| <i>set2Δ</i>         | <i>set2Δ</i>         | <i>set2Δ</i>         |
| W303 <i>set2Δ</i> vs | W303 <i>set2Δ</i> vs | W303 <i>set2Δ</i> vs |
| W303                 | W303                 | W303                 |
| Exon                 | Intron               | Junction             |

Strains compared:

Feature:

| Systematic Name | Common Name                                                     |             |             |             |
|-----------------|-----------------------------------------------------------------|-------------|-------------|-------------|
| SNR17A          | SNR17A                                                          | 0,179532366 | 0,409513139 | 0,475160914 |
| SNR17B          | SNR17B                                                          | 0,120026884 | 0,119309126 | 0,475160914 |
| YAL001C         | TFC3: transcription initiation from RNA polymerase III promoter | 0,165071499 | 0,430577299 | 0,054720882 |
| YAL003W         | EFB1: translational elongation                                  | 0,211736715 | 0,304137702 | 0,132134784 |

|           |                                                                  |              |              |              |
|-----------|------------------------------------------------------------------|--------------|--------------|--------------|
| YAL030W   | SNC1: endocytosis                                                | -0,082878968 | 0,096100317  | -0,189253701 |
| YBL018C   | POP8: rRNA processing                                            | -0,212412238 | 0,058167124  | -0,206129316 |
| YBL026W   | LSM2: nuclear mRNA splicing, via spliceosome                     | -0,029191752 | 0,113811577  | -0,138439947 |
| YBL027W   | RPL19B: protein biosynthesis                                     | -0,022073083 | 0,007295409  | -0,124172181 |
| YBL040C   | ERD2: protein retention in ER                                    | 0,323995887  | 0,131494076  | 0,396040843  |
| YBL050W   | SEC17: ER to Golgi transport                                     | -0,095915906 | 0,253684667  | -0,286196087 |
| YBL059C-A | YBL059C-A: biological process unknown                            | -0,013927938 | 0,010030269  | -0,143533861 |
| YBL059W   | YBL059W: biological process unknown                              | 0,152449468  | 0,162161261  | -0,066297146 |
| YBL072C   | RPS8A: protein biosynthesis                                      | -0,532730657 | 0,026612668  | -0,452866309 |
| YBL087C   | RPL23A: protein biosynthesis                                     | -0,357007438 | 0,166006248  | -0,224690234 |
| YBL091C-A | SCS22: biological process unknown                                | -0,097880351 | -0,104211451 | -0,111723188 |
| YBL092W   | RPL32: protein biosynthesis                                      | -0,395009641 | 0,014446788  | -0,343364834 |
| YBR048W   | RPS11B: protein biosynthesis                                     | -0,102572706 | 0,188638221  | 0,027336907  |
| YBR078W   | ECM33: cell wall organization and biogenesis                     | -0,311801837 | 0,425897026  | 0,189227605  |
| YBR082C   | UBC4: response to stress                                         | -0,077356406 | 0,040574631  | 0,203699913  |
| YBR084C-A | RPL19A: protein biosynthesis                                     | 0,01775962   | 0,229785276  | -0,012751235 |
| YBR089C-A | NHP6B: regulation of transcription from RNA polymerase II promot | -0,156755966 | -0,099036393 | -0,077709065 |
| YBR119W   | MUD1: nuclear mRNA splicing, via spliceosome                     | -0,333332655 | 0,133563668  | 0,183185186  |
| YBR181C   | RPS6B: protein biosynthesis                                      | -0,217504038 | -0,100770562 | -0,260333796 |
| YBR186W   | PCH2: regulation of meiosis                                      | 0,079603241  | -0,174501391 | 0,03507107   |
| YBR189W   | RPS9B: protein biosynthesis                                      | -0,300905171 | 0,189303655  | -0,110252744 |
| YBR191W   | RPL21A: protein biosynthesis                                     | -0,003689024 | 0,037097052  | -0,105298012 |
| YBR219C   | YBR219C: biological process unknown                              | 0,302167042  | 0,109727243  | -0,2371085   |
| YBR230C   | YBR230C: biological process unknown                              | -0,20846058  | -0,028946609 | -0,112208349 |
| YCR028C-A | RIM1: mitochondrial genome maintenance                           | -0,235131762 | 0,168255756  | -0,303605098 |
| YCR031C   | RPS14A: protein biosynthesis                                     | 0,01769516   | -0,001457289 | -0,325028519 |
| YCR097W   | HMRA1: regulation of transcription, mating-type specific         | -0,087480186 | -0,125252808 | 0,210237546  |
| YCR097W_2 | HMRA1: regulation of transcription, mating-type specific         | -0,087480186 | 0,257660297  | -0,090208054 |
| YDL012C   | YDL012C: biological process unknown                              | 0,170019487  | 0,22542085   | -0,027902817 |
| YDL029W   | ARP2: actin filament organization                                | -0,237036321 | -0,013686696 | -0,104101314 |

|           |                                                                   |              |              |              |
|-----------|-------------------------------------------------------------------|--------------|--------------|--------------|
| YDL061C   | RPS29B: protein biosynthesis                                      | -0,58300051  | 0,047462424  | -0,173908988 |
| YDL064W   | UBC9: G2/M transition of mitotic cell cycle                       | -0,091390691 | 0,311697893  | -0,017512547 |
| YDL075W   | RPL31A: protein biosynthesis                                      | -0,439347825 | -0,024871062 | -0,316132645 |
| YDL079C   | MRK1: protein amino acid phosphorylation                          | 0,01126874   | -0,188513328 | -0,070998494 |
| YDL082W   | RPL13A: protein biosynthesis                                      | 0,036307718  | -0,159309322 | -0,201672696 |
| YDL083C   | RPS16B: protein biosynthesis                                      | -0,270206753 | 0,035178519  | -0,191822659 |
| YDL108W   | KIN28: protein amino acid phosphorylation                         | 0,115394148  | 0,35559232   | -0,010479963 |
| YDL115C   | IWR1: meiosis                                                     | -0,027822684 | 0,222452107  | 0,01794767   |
| YDL125C   | HNT1: nucleotide metabolism                                       | 0,150979749  | 0,417441272  | 0,107370516  |
| YDL130W   | RPP1B: translational elongation                                   | 0,129329734  | 0,03361241   | 0,076925895  |
| YDL136W   | RPL35B: protein biosynthesis                                      | -0,051231833 | -0,074101242 | -0,095743445 |
| YDL137W   | ARF2: ER to Golgi transport                                       | 0,114437953  | 0,19562268   | -0,111421106 |
| YDL189W   | RBS1: galactose metabolism                                        | -0,155225682 | -0,230192081 | 0,10252156   |
| YDL191W   | RPL35A: protein biosynthesis                                      | -0,335531952 | -0,04203484  | 0,037336329  |
| YDL219W   | DTD1: translation                                                 | -0,025014223 | 0,256736658  | -0,1622494   |
| YDR005C   | MAF1: negative regulation of transcription from RNA polymerase II | 0,36958684   | 0,651360683  | 0,075511485  |
| YDR025W   | RPS11A: protein biosynthesis                                      | -0,333258131 | 0,106840218  | 0,078931102  |
| YDR059C   | UBC5: endocytosis                                                 | 0,044740636  | 0,076179606  | -0,109663304 |
| YDR064W   | RPS13: protein biosynthesis                                       | 0,032505182  | 0,009755861  | 0,032362444  |
| YDR092W   | UBC13: protein monoubiquitination                                 | -0,240604013 | 0,042717895  | -0,107661716 |
| YDR129C   | SAC6: endocytosis                                                 | 0,286808619  | 0,239755444  | 0,229732137  |
| YDR139C   | RUB1: protein deneddylation                                       | -0,058428318 | 0,007907524  | -0,086693717 |
| YDR305C   | HNT2: nucleoside catabolism                                       | -0,011522485 | 0,094690299  | -0,040540431 |
| YDR367W   | YDR367W: biological process unknown                               | -0,292927214 | 0,012127248  | 0,074555654  |
| YDR381W   | YRA1: mRNA-nucleus export                                         | 0,550962968  | 0,456143251  | -0,255556976 |
| YDR397C   | NCB2: negative regulation of transcription from RNA polymerase II | -0,149254033 | -0,107014295 | 0,089139706  |
| YDR424C   | DYN2: microtubule-based process                                   | -0,083286781 | 0,262615324  | -0,122498251 |
| YDR424C_2 | DYN2: microtubule-based process                                   | -0,083286781 | 0,007003889  | -0,076188462 |
| YDR447C   | RPS17B: protein biosynthesis                                      | -0,635093887 | 0,016247829  | -0,819300614 |
| YDR450W   | RPS18A: protein biosynthesis                                      | -0,55362253  | -0,087052182 | 0,170002635  |



|             |                                             |              |              |              |
|-------------|---------------------------------------------|--------------|--------------|--------------|
| YDR471W     | RPL27B: protein biosynthesis                | -0,290350138 | -0,13498606  | -0,489307995 |
| YDR500C     | RPL37B: protein biosynthesis                | -0,361847829 | -0,010202131 | -0,008431309 |
| YEL012W     | UBC8: protein monoubiquitination            | -0,044346909 | 0,147182557  | -0,146529149 |
| YER003C     | PMI40: protein amino acid glycosylation     | 0,052801052  | 0,011636771  | -0,088184102 |
| YER007C-A   | RBF20: biological process unknown           | -0,2384693   | -0,07145492  | -0,325631185 |
| YER044C-A   | MEI4: sporulation (sensu Fungi)             | -0,351592518 | -0,151701928 | 0,004865552  |
| YER056C-A   | RPL34A: protein biosynthesis                | -0,541585896 | 0,062414969  | 0,050464645  |
| YER074W     | RPS24A: protein biosynthesis                | 0,054557473  | 0,04254055   | -0,158452727 |
| YER074W-A   | YOS1: ER to Golgi transport                 | -0,559045826 | -0,026018851 | -0,057991832 |
| YER074W-A_2 | YOS1: ER to Golgi transport                 | -0,559045826 | 0,143401446  | -0,248652569 |
| YER093C-A   | YER093C-A: biological process unknown       | -0,159774285 | -0,064668218 | 0,038038981  |
| YER102W     | RPS8B: protein biosynthesis                 | -0,101317784 | -0,009448429 | -0,191203564 |
| YER117W     | RPL23B: protein biosynthesis                | -0,343887992 | 0,003791542  | -0,134028889 |
| YER131W     | RPS26B: protein biosynthesis                | -0,384974972 | 0,162040904  | -0,130140918 |
| YER133W     | GLC7: 35S primary transcript processing     | 0,488999656  | 0,236534248  | 0,082432211  |
| YER179W     | DMC1: meiosis                               | -0,077642648 | -0,105373732 | 0,357317828  |
| YFL034C-A   | RPL22B: protein biosynthesis                | 0,324879329  | 0,402568729  | -0,197716867 |
| YFL034C-B   | MOB2: protein amino acid phosphorylation    | 0,234690017  | 0,577697233  | 0,099536544  |
| YFL039C     | ACT1: cell wall organization and biogenesis | 0,236173598  | 0,140061395  | 0,078830332  |
| YFR024C-A   | LSB3: actin filament organization           | 0,04653254   | -0,057232498 | 0,058374103  |
| YFR031C-A   | RPL2A: protein biosynthesis                 | -0,174390656 | 0,064448372  | -0,230923826 |
| YFR032C-A   | RPL29: protein biosynthesis                 | -0,293105611 | -0,055738995 | -0,159028407 |
| YGL030W     | RPL30: protein biosynthesis                 | -0,523551067 | 0,035883236  | -0,565817743 |
| YGL031C     | RPL24A: protein biosynthesis                | -0,573106514 | 0,00759704   | -0,09224415  |
| YGL033W     | HOP2: synapsis                              | -0,407610449 | 0,034895609  | 0,043312635  |
| YGL076C     | RPL7A: protein biosynthesis                 | -0,523500125 | 0,30510027   | -0,29597994  |
| YGL076C_2   | RPL7A: protein biosynthesis                 | -0,523500125 | 0,09264352   | -0,301119457 |
| YGL087C     | MMS2: DNA repair                            | -0,054127804 | 0,061023129  | 0,01956173   |
| YGL103W     | RPL28: protein biosynthesis                 | -0,658331337 | 0,556380583  | -0,041083503 |
| YGL137W     | SEC27: ER to Golgi transport                | 0,2304621    | 0,155470087  | 0,074681811  |

|           |                                                     |              |              |              |
|-----------|-----------------------------------------------------|--------------|--------------|--------------|
| YGL178W   | MPT5: cell wall organization and biogenesis         | 0,478425212  | 0,644742746  | 0,25831711   |
| YGL187C   | COX4: aerobic respiration                           | -0,240699973 | -0,294815613 | 0,246817074  |
| YGL189C   | RPS26A: protein biosynthesis                        | -0,4843175   | 0,081345507  | 0,25190775   |
| YGL226C-A | OST5: protein amino acid N-linked glycosylation     | -0,512263906 | 0,042623346  | 0,121035265  |
| YGL232W   | TAN1: tRNA modification                             | -0,112768072 | 0,120412147  | 0,15920514   |
| YGL251C   | HFM1: meiosis                                       | 0,29428327   | 0,077227942  | 0,118149666  |
| YGR001C   | YGR001C: biological process unknown                 | 0,180729454  | 0,073570806  | -0,264761282 |
| YGR001C_2 | YGR001C: biological process unknown                 | 0,180729454  | -0,165710343 | -0,104290382 |
| YGR027C   | RPS25A: protein biosynthesis                        | -0,390831241 | -0,040467717 | 0,055085204  |
| YGR029W   | ERV1: mitochondrion organization and biogenesis     | 0,098741562  | -0,015056609 | -0,02525258  |
| YGR118W   | RPS23A: protein biosynthesis                        | -0,516751313 | -0,095622996 | -0,051671919 |
| YGR148C   | RPL24B: protein biosynthesis                        | -0,238955496 | -0,079261842 | -0,422580706 |
| YGR183C   | QCR9: aerobic respiration                           | 0,032723672  | -0,060734858 | -0,108525958 |
| YGR214W   | RPS0A: protein biosynthesis                         | -0,39341884  | 0,342565718  | -0,136665302 |
| YGR225W   | AMA1: sporulation (sensu Fungi)                     | -0,154748502 | -0,175855287 | -0,028387253 |
| YHL001W   | RPL14B: protein biosynthesis                        | -0,173527858 | -0,114484976 | -0,089159422 |
| YHR001W-A | QCR10: aerobic respiration                          | 0,500101571  | 0,164103448  | -0,502539169 |
| YHR010W   | RPL27A: protein biosynthesis                        | -0,105507403 | 0,038751596  | 0,281551015  |
| YHR012W   | VPS29: retrograde transport, endosome to Golgi      | -0,202999004 | 0,106197888  | 0,06133366   |
| YHR016C   | YSC84: endocytosis                                  | 0,118339863  | 0,060767752  | -0,05979998  |
| YHR021C   | RPS27B: protein biosynthesis                        | -0,328457957 | -0,131050951 | -0,032800257 |
| YHR039C-A | VMA10: vacuolar acidification                       | -0,451720434 | -0,116528501 | -0,549439815 |
| YHR041C   | SRB2: transcription from RNA polymerase II promoter | -0,26576945  | -0,169070051 | -0,095489774 |
| YHR077C   | NMD2: mRNA catabolism                               | 0,081519098  | 0,007536556  | 0,138011929  |
| YHR097C   | YHR097C: biological process unknown                 | 0,182334105  | 0,202783885  | 0,10161465   |
| YHR101C   | BIG1: cell wall biosynthesis (sensu Fungi)          | 0,171000266  | 0,431671966  | 0,111503133  |
| YHR123W   | EPT1: phosphatidylethanolamine biosynthesis         | -0,043605697 | 0,121007413  | -0,464252977 |
| YHR141C   | RPL42B: protein biosynthesis                        | -0,540535649 | -0,274271281 | -0,600623573 |
| YHR203C   | RPS4B: protein biosynthesis                         | -0,103996623 | 0,032387954  | -0,224720955 |
| YIL004C   | BET1: ER to Golgi transport                         | 0,02907017   | 0,048018935  | -0,174416338 |

|           |                                                                 |              |              |              |
|-----------|-----------------------------------------------------------------|--------------|--------------|--------------|
| YIL018W   | RPL2B: protein biosynthesis                                     | -0,41644019  | 0,005619808  | -0,292759628 |
| YIL052C   | RPL34B: protein biosynthesis                                    | -0,731564511 | -0,12076533  | -0,015426966 |
| YIL069C   | RPS24B: protein biosynthesis                                    | -0,201454361 | 0,048051958  | -0,064640103 |
| YIL106W   | MOB1: protein amino acid phosphorylation                        | -0,121324231 | -0,054374021 | -0,197041382 |
| YIL111W   | COX5B: mitochondrial electron transport, cytochrome c to oxygen | 0,099982167  | 0,327240401  | 0,0908799    |
| YIL133C   | RPL16A: protein biosynthesis                                    | -0,251214774 | -0,097466482 | -0,3370084   |
| YIL148W   | RPL40A: protein biosynthesis                                    | -0,1919781   | 0,127434381  | -0,226908273 |
| YJL001W   | PRE3: response to stress                                        | -0,341033844 | 0,232347516  | -0,452269642 |
| YJL024C   | APS3: vesicle-mediated transport                                | -0,19594778  | 0,274562041  | 0,031802453  |
| YJL041W   | NSP1: mRNA-nucleus export                                       | 0,258476587  | 0,488949133  | 0,610972012  |
| YJL136C   | RPS21B: protein biosynthesis                                    | -0,120122912 | 0,050712625  | -0,084405035 |
| YJL177W   | RPL17B: protein biosynthesis                                    | -0,006949745 | 0,084940173  | 0,006876683  |
| YJL189W   | RPL39: protein biosynthesis                                     | -0,157433909 | 0,021886607  | -0,49504713  |
| YJL191W   | RPS14B: protein biosynthesis                                    | 0,095334272  | 0,433868503  | -0,232488671 |
| YJL205C   | NCE1: biological process unknown                                | 0,156264067  | 0,287747695  | -0,016459377 |
| YJR021C   | REC107: meiotic recombination                                   | 0,028394042  | 0,14655537   | -0,059785042 |
| YJR094W-A | RPL43B: protein biosynthesis                                    | -0,433153985 | -0,042239623 | -0,412471985 |
| YJR145C   | RPS4A: protein biosynthesis                                     | -0,064592237 | 0,048380437  | -0,172854273 |
| YKL002W   | DID4: protein retention in Golgi                                | 0,056836662  | 0,17038086   | -0,148848825 |
| YKL006C-A | SFT1: intra-Golgi transport                                     | -0,367363693 | -0,261921072 | -0,082282097 |
| YKL006W   | RPL14A: protein biosynthesis                                    | 0,245189767  | 0,114471644  | -0,101605882 |
| YKL081W   | TEF4: translational elongation                                  | 0,318428133  | -0,084866769 | 0,222711061  |
| YKL156W   | RPS27A: protein biosynthesis                                    | -0,113990404 | 0,005874608  | -0,146567069 |
| YKL157W   | APE2: peptide metabolism                                        | 0,131962408  | -0,044048226 | 1,34E-05     |
| YKL180W   | RPL17A: protein biosynthesis                                    | -0,112870169 | 0,169752162  | -0,310062078 |
| YKL186C   | MTR2: poly(A)+ mRNA-nucleus export                              | -0,196426382 | -0,032466935 | 0,052571996  |
| YKL186C_2 | MTR2: poly(A)+ mRNA-nucleus export                              | -0,196426382 | -0,11506968  | 0,076571733  |
| YKL186C_3 | MTR2: poly(A)+ mRNA-nucleus export                              | -0,196426382 | -0,132076687 | 0,050745236  |
| YKL186C_4 | MTR2: poly(A)+ mRNA-nucleus export                              | -0,196426382 | -0,199668771 | 0,13878537   |
| YKL186C_5 | MTR2: poly(A)+ mRNA-nucleus export                              | -0,196426382 | -0,218927749 | 0,026629702  |

|           |                                              |              |              |              |
|-----------|----------------------------------------------|--------------|--------------|--------------|
| YKL186C_6 | MTR2: poly(A)+ mRNA-nucleus export           | -0,196426382 | -0,035295841 | -0,045712278 |
| YKL190W   | CNB1: cell wall organization and biogenesis  | 0,018632689  | 0,121907613  | 0,01247367   |
| YKR057W   | RPS21A: protein biosynthesis                 | -0,064280783 | 0,139072879  | -0,248542205 |
| YKR094C   | RPL40B: protein biosynthesis                 | -0,380341492 | -0,0025212   | -0,083890006 |
| YLL050C   | COF1: actin filament organization            | -0,374555593 | 0,120059357  | -0,150050427 |
| YLR048W   | RPS0B: protein biosynthesis                  | -0,280549271 | 0,286520514  | 0,259100852  |
| YLR061W   | RPL22A: protein biosynthesis                 | -0,053262229 | -0,052871432 | -0,041674086 |
| YLR078C   | BOS1: ER to Golgi transport                  | -0,04100539  | -0,115519178 | -0,013845596 |
| YLR093C   | NYV1: vesicle fusion                         | 0,071605015  | 0,197976986  | -0,120434598 |
| YLR128W   | DCN1: protein neddylation                    | 0,134214168  | -0,071357575 | -0,060682918 |
| YLR185W   | RPL37A: protein biosynthesis                 | -0,346025638 | 0,076913033  | -0,569390667 |
| YLR211C   | YLR211C: biological process unknown          | -0,100542819 | 0,111169281  | -0,145489603 |
| YLR275W   | SMD2: nuclear mRNA splicing, via spliceosome | -0,075677457 | 0,051683575  | 0,043212068  |
| YLR287C-A | RPS30A: protein biosynthesis                 | -0,136500517 | 0,262867308  | -0,179007171 |
| YLR306W   | UBC12: protein monoubiquitination            | 0,066098776  | 0,019770951  | 0,08905016   |
| YLR316C   | TAD3: tRNA modification                      | 0,21277497   | 0,265574056  | -0,079374707 |
| YLR316C_2 | TAD3: tRNA modification                      | 0,21277497   | 0,213672166  | -0,039923129 |
| YLR333C   | RPS25B: protein biosynthesis                 | -0,679388975 | -0,132827947 | 0,047418037  |
| YLR344W   | RPL26A: protein biosynthesis                 | -0,192751819 | 0,149627519  | 0,155221857  |
| YLR367W   | RPS22B: protein biosynthesis                 | -0,481715585 | 0,294014117  | 0,099886033  |
| YLR367W_2 | RPS22B: protein biosynthesis                 | -0,481715585 | 0,424195873  | 0,063337962  |
| YLR388W   | RPS29A: protein biosynthesis                 | -0,32412403  | 0,232534411  | -0,457136834 |
| YLR406C   | RPL31B: protein biosynthesis                 | -0,29374143  | 0,002025023  | -0,335471363 |
| YLR426W   | YLR426W: biological process unknown          | 0,299696721  | 0,58852354   | -0,064227054 |
| YLR448W   | RPL6B: protein biosynthesis                  | -0,059144815 | -0,130226118 | -0,005997687 |
| YML024W   | RPS17A: protein biosynthesis                 | -0,410800908 | 0,068634088  | -0,420158321 |
| YML025C   | YML6: protein biosynthesis                   | 0,183101984  | -0,000963124 | -0,001612649 |
| YML026C   | RPS18B: protein biosynthesis                 | -0,088179071 | 0,161351807  | -0,169729476 |
| YML034W   | SRC1: mitotic sister chromatid segregation   | 0,078325759  | 0,14347996   | -0,020922901 |
| YML034W_2 | SRC1: mitotic sister chromatid segregation   | 0,078325759  | -0,012813756 | 0,014342849  |

|         |                                                           |              |              |              |
|---------|-----------------------------------------------------------|--------------|--------------|--------------|
| YML056C | IMD4: biological process unknown                          | -0,064110239 | 0,450136979  | 0,230102269  |
| YML067C | ERV41: ER to Golgi transport                              | 0,153872572  | 0,049103314  | -0,20692026  |
| YML073C | RPL6A: protein biosynthesis                               | -0,045743132 | 0,038767145  | -0,16221568  |
| YML085C | TUB1: mitotic sister chromatid segregation                | 0,044944226  | -0,012022957 | 0,031399587  |
| YML094W | GIM5: tubulin folding                                     | -0,027851617 | 0,059103183  | -0,136539682 |
| YML124C | TUB3: mitotic sister chromatid segregation                | -0,001367455 | 0,178492665  | -0,039825627 |
| YMR033W | ARP9: chromatin remodeling                                | -0,007161559 | -0,00326674  | 0,124652883  |
| YMR079W | SEC14: sporulation (sensu Fungi)                          | 0,04734132   | 0,118170617  | -0,075361557 |
| YMR116C | ASC1: biological process unknown                          | -0,100389833 | -0,10968707  | -0,168893301 |
| YMR125W | STO1: nuclear mRNA splicing, via spliceosome              | -0,192808517 | 0,104010762  | -0,222966871 |
| YMR133W | REC114: meiotic recombination                             | 0,027931046  | -0,006828412 | -0,153774649 |
| YMR142C | RPL13B: protein biosynthesis                              | -0,050931975 | 0,011331668  | -0,09761018  |
| YMR143W | RPS16A: protein biosynthesis                              | -0,145465569 | -0,20776743  | -0,178107884 |
| YMR194W | RPL36A: protein biosynthesis                              | -0,526897933 | 0,085680581  | -0,673340057 |
| YMR201C | RAD14: nucleotide-excision repair, DNA damage recognition | 0,065803068  | -0,108555966 | -0,230933198 |
| YMR225C | MRPL44: protein biosynthesis                              | -0,207267357 | -0,080505433 | -0,281391564 |
| YMR230W | RPS10B: protein biosynthesis                              | -0,315827182 | -0,181853393 | -0,416527879 |
| YMR292W | GOT1: ER to Golgi transport                               | 0,395680166  | 0,235327068  | 0,267001967  |
| YNL012W | SPO1: meiosis                                             | 0,317676548  | 0,149692891  | -0,158101839 |
| YNL044W | YIP3: ER to Golgi transport                               | 0,266010698  | 0,127013105  | -0,110717121 |
| YNL050C | YNL050C: biological process unknown                       | -0,092014812 | -0,061411027 | -0,036278201 |
| YNL069C | RPL16B: protein biosynthesis                              | 0,091378726  | -0,135264444 | -0,002114395 |
| YNL096C | RPS7B: protein biosynthesis                               | -0,238203949 | 0,083692303  | -0,225981675 |
| YNL112W | DBP2: mRNA catabolism, nonsense-mediated decay            | 0,509731286  | 0,375543615  | 0,716208333  |
| YNL130C | CPT1: phosphatidylcholine biosynthesis                    | -0,456175613 | -0,141571238 | -0,139367482 |
| YNL147W | LSM7: nuclear mRNA splicing, via spliceosome              | -0,160343398 | 0,06834648   | -0,058624779 |
| YNL162W | RPL42A: protein biosynthesis                              | -0,327004242 | 0,282000991  | -0,497914829 |
| YNL246W | VPS75: protein-vacuolar targeting                         | 0,098638841  | 0,078704722  | -0,085567106 |
| YNL265C | IST1: protein biosynthesis                                | -0,114163189 | 0,237795096  | -0,222332646 |
| YNL301C | RPL18B: protein biosynthesis                              | 0,052267758  | -0,114560918 | 0,161017595  |

|           |                                                                   |              |              |              |
|-----------|-------------------------------------------------------------------|--------------|--------------|--------------|
| YNL302C   | RPS19B: protein biosynthesis                                      | -0,134381587 | 0,070768214  | -0,369847065 |
| YNL312W   | RFA2: DNA recombination                                           | 0,027831574  | 0,117989476  | 0,177354786  |
| YNR053C   | NOG2: ribosome assembly                                           | 0,344442025  | 0,115926397  | 0,329089998  |
| YOL047C   | YOL047C: biological process unknown                               | 0,043635494  | 0,094064798  | -0,068402406 |
| YOL048C   | YOL048C: biological process unknown                               | -0,22206719  | -0,015941327 | 0,328960247  |
| YOL120C   | RPL18A: protein biosynthesis                                      | 0,009382878  | 0,232163528  | -0,030374388 |
| YOL121C   | RPS19A: protein biosynthesis                                      | -0,485548202 | 0,019246889  | -0,085204367 |
| YOL127W   | RPL25: protein biosynthesis                                       | -0,296754918 | 0,003206396  | -0,183708236 |
| YOR096W   | RPS7A: protein biosynthesis                                       | -0,331257373 | 0,046435356  | -0,3536696   |
| YOR122C   | PFY1: response to osmotic stress                                  | -0,125457242 | -0,001914688 | 0,096776311  |
| YOR182C   | RPS30B: protein biosynthesis                                      | -0,253537014 | -0,008241416 | 0,037253301  |
| YOR234C   | RPL33B: protein biosynthesis                                      | -0,255602965 | 0,030629677  | -0,111498515 |
| YOR293W   | RPS10A: protein biosynthesis                                      | -0,344459105 | 0,131671851  | -0,543732734 |
| YOR312C   | RPL20B: protein biosynthesis                                      | -0,051300782 | 0,072986662  | -0,283438501 |
| YPL031C   | PHO85: protein amino acid phosphorylation                         | 0,020527707  | -0,040126573 | -0,181273331 |
| YPL075W   | GCR1: positive regulation of transcription from RNA polymerase II | 0,400593784  | 0,225056062  | -0,194031252 |
| YPL079W   | RPL21B: protein biosynthesis                                      | -0,444807033 | -0,11407887  | -0,107836711 |
| YPL081W   | RPS9A: protein biosynthesis                                       | 0,101261192  | 0,159630657  | -0,003467385 |
| YPL090C   | RPS6A: protein biosynthesis                                       | -0,35746377  | -0,003382894 | -0,086927872 |
| YPL129W   | TAF14: chromatin remodeling                                       | 0,201419531  | 0,059354029  | 0,150049519  |
| YPL143W   | RPL33A: protein biosynthesis                                      | -0,003484575 | 0,32311519   | -0,120116427 |
| YPL175W   | SPT14: GPI anchor biosynthesis                                    | 0,134281087  | 0,194258801  | -0,147419633 |
| YPL198W   | RPL7B: protein biosynthesis                                       | 0,404684292  | 0,317858122  | 0,050041172  |
| YPL198W_2 | RPL7B: protein biosynthesis                                       | 0,404684292  | 0,269744975  | -0,002186439 |
| YPL218W   | SAR1: ER to Golgi transport                                       | 0,482701801  | 0,243593735  | 0,141814872  |
| YPL241C   | CIN2: microtubule-based process                                   | 0,036789594  | 0,056902273  | -0,098695054 |
| YPL249C-A | RPL36B: protein biosynthesis                                      | -0,218848101 | 0,259284601  | -0,175530062 |
| YPR028W   | YOP1: vesicle-mediated transport                                  | -0,024420094 | 0,07035215   | 0,157289199  |
| YPR043W   | RPL43A: protein biosynthesis                                      | -0,08066806  | 0,185530709  | -0,058821312 |
| YPR063C   | YPR063C: biological process unknown                               | -0,18297896  | -0,171442604 | -0,465171235 |

|         |                                                      |              |              |              |
|---------|------------------------------------------------------|--------------|--------------|--------------|
| YPR098C | YPR098C: biological process unknown                  | -0,481972973 | 0,068130516  | -0,190351173 |
| YPR132W | RPS23B: protein biosynthesis                         | -0,539123591 | -0,104889576 | -0,640414606 |
| YPR187W | RPO26: transcription from RNA polymerase II promoter | 0,038260748  | 0,061583442  | -0,141577996 |





























|    |                                                                                                                                                |                            |          |    |                           |    |   |    |
|----|------------------------------------------------------------------------------------------------------------------------------------------------|----------------------------|----------|----|---------------------------|----|---|----|
| wt | UPP974 endoplasmic reticulum membrane protein YN021W OS-Saccharomyces cerevisiae (strain ATCC 20458 / S288c) (GN:YN021W PE1:1 SV:1)            | qf953723                   | 47091.1  | 61 | FVTSYVNVLSNLSAAPPVYALDGVK | 2  | 0 | 2  |
| wt | NAD-dependent male enzyme, mitochondrial OS-Saccharomyces cerevisiae (strain ATCC 20458 / S288c) (GN:M461 PE1:1 SV:1)                          | qf970151                   | 74277.4  | 1  | 71                        | 71 | 0 | 1  |
| wt | Tea1p protein 1 subunit gamma OS-Saccharomyces cerevisiae (strain ATCC 20458 / S288c) (GN:CTT1 PE1:1 SV:2)                                     | qf979077                   | 58817.6  | 1  | 29                        | 1  | 0 | 1  |
| wt | Heat shock protein S8A2 OS-Saccharomyces cerevisiae (strain ATCC 20458 / S288c) (GN:S8A2 PE1:1 SV:3)                                           | qf980125                   | 60471.8  | 50 | 50                        | 1  | 0 | 1  |
| wt | YFPW domain-containing protein YL845W OS-Saccharomyces cerevisiae (strain ATCC 20458 / S288c) (GN:YL845W PE1:1 SV:1)                           | qf969138                   | 55509.9  | 0  | 0                         | 1  | 0 | 1  |
| wt | Saccharosyltransferase YNF041 OS-Saccharomyces cerevisiae (strain ATCC 20458 / S288c) (GN:YNF041 PE1:1 SV:2)                                   | qf970595 qf973958          | 41814.4  | 0  | 0                         | 1  | 0 | 1  |
| wt | Keratin, type I cytokeletal 2 epidermal - Homo sapiens                                                                                         | qf959088                   | 65864.4  | 18 | 18                        | 3  | 0 | 3  |
| wt | GMP synthase [glutamine:hydrolyzing] OS-Saccharomyces cerevisiae (strain ATCC 20458 / S288c) (GN:GUA1 PE1:1 SV:4)                              | qf973825                   | 28483.4  | 2  | 2                         | 0  | 0 | 2  |
| wt | Isomaltotriphosphatase YNF057 OS-Saccharomyces cerevisiae (strain ATCC 20458 / S288c) (GN:YNF057 PE1:1 SV:1)                                   | qf972584                   | 40152.4  | 1  | 1                         | 0  | 0 | 1  |
| wt | Protonome component PRE3 OS-Saccharomyces cerevisiae (strain ATCC 20458 / S288c) (GN:PRE3 PE1:1 SV:1)                                          | qf940302                   | 25065    | 15 | 15                        | 0  | 0 | 2  |
| wt | Pre-mRNA splicing factor SYT2 OS-Saccharomyces cerevisiae (strain ATCC 20458 / S288c) (GN:SYT2 PE1:1 SV:1)                                     | qf953277                   | 24003.3  | 4  | 4                         | 0  | 0 | 1  |
| wt | Ribosome 10S OS-Saccharomyces cerevisiae (strain ATCC 20458 / S288c) (GN:R10S PE1:1 SV:1)                                                      | qf960255                   | 54071.2  | 1  | 1                         | 0  | 0 | 1  |
| wt | Tea1p complex protein 1 subunit theta OS-Saccharomyces cerevisiae (strain ATCC 20458 / S288c) (GN:CTT1 PE1:1 SV:1)                             | qf947079                   | 61464.6  | 1  | 1                         | 0  | 0 | 1  |
| wt | Transcriptional activator repressor MOT3 OS-Saccharomyces cerevisiae (strain ATCC 20458 / S288c) (GN:MOT3 PE1:1 SV:1)                          | qf957485                   | 43806.6  | 3  | 3                         | 0  | 0 | 1  |
| wt | MAP kinase kinase PRS2 OS-Saccharomyces cerevisiae (strain ATCC 20458 / S288c) (GN:PRS2 PE1:1 SV:4)                                            | qf908018                   | 72723.5  | 4  | 4                         | 0  | 0 | 1  |
| wt | ADP-ATPase protein 2 OS-Saccharomyces cerevisiae (strain ATCC 20458 / S288c) (GN:PTP2 PE1:1 SV:1)                                              | qf914239                   | 34628    | 4  | 4                         | 0  | 0 | 1  |
| wt | Transcription initiation factor TFIID subunit 6 OS-Saccharomyces cerevisiae (strain ATCC 20458 / S288c) (GN:TAI6 PE1:1 SV:1)                   | qf915300                   | 57904    | 6  | 6                         | 0  | 0 | 1  |
| wt | 26S proteasome regulatory subunit RPN10 OS-Saccharomyces cerevisiae (strain ATCC 20458 / S288c) (GN:RPN10 PE1:1 SV:1)                          | qf945588                   | 343961.1 | 4  | 4                         | 0  | 0 | 1  |
| wt | UPP906 protein YP_ZD0W OS-Saccharomyces cerevisiae (strain ATCC 20458 / S288c) (GN:YP_ZD0W PE1:1 SV:1)                                         | qf908071                   | 17444.2  | 1  | 1                         | 0  | 0 | 1  |
| wt | Protonome component PRE2 OS-Saccharomyces cerevisiae (strain ATCC 20458 / S288c) (GN:PRE2 PE1:1 SV:1)                                          | qf936656                   | 31638.9  | 3  | 3                         | 0  | 0 | 1  |
| wt | RNA annealing protein YRA1 OS-Saccharomyces cerevisiae (strain ATCC 20458 / S288c) (GN:YRA1 PE1:1 SV:2)                                        | qf921159                   | 249563   | 42 | 42                        | 0  | 0 | 10 |
| wt | Glucohydrolase OS-Saccharomyces cerevisiae (strain ATCC 20458 / S288c) (GN:GLK1 PE1:1 SV:1)                                                    | qf917789                   | 55570.1  | 7  | 7                         | 0  | 0 | 1  |
| wt | Ruv-B-like protein 2 OS-Saccharomyces cerevisiae (strain ATCC 20458 / S288c) (GN:RVB2 PE1:1 SV:1)                                              | qf921444                   | 51613.1  | 10 | 10                        | 0  | 0 | 4  |
| wt | 5-methyltetrahydrofolate:homocysteine methyltransferase OS-Saccharomyces cerevisiae (strain ATCC 20458 / S288c) (GN:MET6 PE1:1 SV:1)           | qf909094                   | 45862.4  | 6  | 6                         | 0  | 0 | 1  |
| wt | Chromatin structure-remodeling complex protein RSC3 OS-Saccharomyces cerevisiae (strain ATCC 20458 / S288c) (GN:RSC3 PE1:1 SV:1)               | qf907079                   | 57797    | 7  | 7                         | 0  | 0 | 3  |
| wt | Protonome component A1 pyruvate OS-Saccharomyces cerevisiae (strain ATCC 20458 / S288c) (GN:R360 PE1:1 SV:1)                                   | qf938127                   | 60489.9  | 39 | 39                        | 0  | 0 | 15 |
| wt | Ribosome-interacting GTPase OS-Saccharomyces cerevisiae (strain ATCC 20458 / S288c) (GN:RIG1 PE1:1 SV:1)                                       | qf939729                   | 40762.5  | 44 | 44                        | 0  | 0 | 12 |
| wt | 40S ribosomal protein S3 OS-Saccharomyces cerevisiae (strain ATCC 20458 / S288c) (GN:RPS3 PE1:1 SV:2)                                          | qf960750                   | 26073.5  | 62 | 62                        | 0  | 0 | 15 |
| wt | Protein NBD1 OS-Saccharomyces cerevisiae (strain ATCC 20458 / S288c) (GN:NBD1 PE1:1 SV:1)                                                      | qf939417                   | 61459.8  | 1  | 1                         | 0  | 0 | 19 |
| wt | Protein NAM8 OS-Saccharomyces cerevisiae (strain ATCC 20458 / S288c) (GN:NAM8 PE1:1 SV:1)                                                      | qf900539                   | 56922.3  | 0  | 0                         | 1  | 0 | 5  |
| wt | RNA 2'-O-methyltransferase (ribitol) OS-Saccharomyces cerevisiae (strain ATCC 20458 / S288c) (GN:NOR1 PE1:1 SV:1)                              | qf915646                   | 144655.5 | 4  | 4                         | 0  | 0 | 11 |
| wt | ATP-dependent nucleoside diphosphate kinase 2 OS-Saccharomyces cerevisiae (strain ATCC 20458 / S288c) (GN:HSD2 PE1:1 SV:1)                     | qf915103                   | 110312.7 | 1  | 1                         | 0  | 0 | 1  |
| wt | Nucleolar protein 3 OS-Saccharomyces cerevisiae (strain ATCC 20458 / S288c) (GN:NPL3 PE1:1 SV:1)                                               | qf901640                   | 45407.3  | 9  | 9                         | 0  | 0 | 7  |
| wt | ATP-dependent molecular chaperone HSC23 OS-Saccharomyces cerevisiae (strain ATCC 20458 / S288c) (GN:HSC23 PE1:1 SV:4)                          | qf915108                   | 80901.4  | 29 | 29                        | 0  | 0 | 11 |
| wt | Protein NBD2 OS-Saccharomyces cerevisiae (strain ATCC 20458 / S288c) (GN:NBD2 PE1:1 SV:1)                                                      | qf915647                   | 144655.5 | 4  | 4                         | 0  | 0 | 19 |
| wt | Protein SRS1 OS-Saccharomyces cerevisiae (strain ATCC 20458 / S288c) (GN:SRS1 PE1:1 SV:1)                                                      | qf925294                   | 37591.6  | 49 | 49                        | 0  | 0 | 16 |
| wt | Replication factor A protein 1 OS-Saccharomyces cerevisiae (strain ATCC 20458 / S288c) (GN:RF1A PE1:1 SV:1)                                    | qf927336                   | 70352.0  | 2  | 2                         | 0  | 0 | 1  |
| wt | Pre-mRNA-splicing factor PRP9 OS-Saccharomyces cerevisiae (strain ATCC 20458 / S288c) (GN:PRP9 PE1:1 SV:1)                                     | qf919736                   | 60322.6  | 16 | 16                        | 0  | 0 | 6  |
| wt | Nucleoside triphosphatase OS-Saccharomyces cerevisiae (strain ATCC 20458 / S288c) (GN:GTP1 PE1:1 SV:1)                                         | qf949666                   | 80252.9  | 1  | 1                         | 0  | 0 | 1  |
| wt | Keratin, type I cytokeletal 14 - Homo sapiens                                                                                                  | qf902533                   | 51622.6  | 11 | 11                        | 0  | 0 | 4  |
| wt | DNA-directed RNA polymerase II subunit RPB3 OS-Saccharomyces cerevisiae (strain ATCC 20458 / S288c) (GN:RPB3 PE1:1 SV:2)                       | qf916370                   | 15297.7  | 6  | 6                         | 0  | 0 | 1  |
| wt | Nucleoside triphosphatase OS-Saccharomyces cerevisiae (strain ATCC 20458 / S288c) (GN:GTP2 PE1:1 SV:1)                                         | qf917528                   | 73860.8  | 0  | 0                         | 1  | 0 | 1  |
| wt | Protonome component C11 OS-Saccharomyces cerevisiae (strain ATCC 20458 / S288c) (GN:PRE1 PE1:1 SV:2)                                           | qf922141                   | 22517.4  | 6  | 6                         | 0  | 0 | 1  |
| wt | 26S proteasome regulatory subunit 7 homolog OS-Saccharomyces cerevisiae (strain ATCC 20458 / S288c) (GN:RPT1 PE1:1 SV:1)                       | qf932249                   | 51984.6  | 27 | 27                        | 0  | 0 | 1  |
| wt | Major histocompatibility protein M50 OS-Saccharomyces cerevisiae (strain ATCC 20458 / S288c) (GN:M50 PE1:1 SV:1)                               | qf924901                   | 44673.7  | 23 | 23                        | 0  | 0 | 13 |
| wt | mRNA export factor MEK37 OS-Saccharomyces cerevisiae (strain ATCC 20458 / S288c) (GN:MEK37 PE1:1 SV:1)                                         | qf909227                   | 67355.5  | 22 | 22                        | 0  | 0 | 13 |
| wt | 40S ribosomal protein S18A OS-Saccharomyces cerevisiae (strain ATCC 20458 / S288c) (GN:RPS18A PE1:1 SV:1)                                      | qf90CXX5 qf90CXX6          | 17037.9  | 4  | 4                         | 0  | 0 | 9  |
| wt | Maleic dehydrogenase, peroxisomal OS-Saccharomyces cerevisiae (strain ATCC 20458 / S288c) (GN:MDH1 PE1:1 SV:1)                                 | qf924219                   | 37182.2  | 49 | 49                        | 0  | 0 | 14 |
| wt | 40S ribosomal protein L12, mitochondrial OS-Saccharomyces cerevisiae (strain ATCC 20458 / S288c) (GN:RPL12 PE1:1 SV:1)                         | qf933163                   | 20650.8  | 1  | 1                         | 0  | 0 | 7  |
| wt | U3 small nuclear RNA-associated protein 10 OS-Saccharomyces cerevisiae (strain ATCC 20458 / S288c) (GN:UTP10 PE1:1 SV:1)                       | qf924425                   | 26099.1  | 1  | 1                         | 0  | 0 | 5  |
| wt | Nucleoside POMA OS-Saccharomyces cerevisiae (strain ATCC 20458 / S288c) (GN:POMA PE1:1 SV:1)                                                   | qf921445                   | 34233.5  | 7  | 7                         | 0  | 0 | 1  |
| wt | Cytoskeleton control protein 2 OS-Saccharomyces cerevisiae (strain ATCC 20458 / S288c) (GN:CCP2 PE1:1 SV:1)                                    | qf912848                   | 46668.9  | 0  | 0                         | 1  | 0 | 1  |
| wt | PAH1-binding protein 1 OS-Saccharomyces cerevisiae (strain ATCC 20458 / S288c) (GN:PB1 PE1:1 SV:1)                                             | qf932527                   | 78793    | 1  | 1                         | 0  | 0 | 6  |
| wt | Protein transport protein SEC1 OS-Saccharomyces cerevisiae (strain ATCC 20458 / S288c) (GN:SEC1 PE1:1 SV:1)                                    | qf904401                   | 130426.2 | 19 | 19                        | 0  | 0 | 5  |
| wt | 54S ribosomal protein L15, mitochondrial OS-Saccharomyces cerevisiae (strain ATCC 20458 / S288c) (GN:RPL15 PE1:1 SV:1)                         | qf936213                   | 23166.8  | 1  | 1                         | 0  | 0 | 1  |
| wt | Eukaryotic translation initiation factor 4E OS-Saccharomyces cerevisiae (strain ATCC 20458 / S288c) (GN:CEK3 PE1:1 SV:1)                       | qf907200                   | 24254.6  | 44 | 44                        | 0  | 0 | 10 |
| wt | Altered inheritance of mitochondria protein 24, mitochondrial OS-Saccharomyces cerevisiae (strain BM11.1a) (GN:AIM24 PE1:1 SV:1)               | qf918106 qf9CZEM7 qf947127 | 444274.4 | 3  | 3                         | 0  | 0 | 1  |
| wt | ATP-binding protein 2c, mitochondrial OS-Saccharomyces cerevisiae (strain ATCC 20458 / S288c) (GN:ATP2 PE1:1 SV:1)                             | qf904785                   | 70418.8  | 2  | 2                         | 0  | 0 | 1  |
| wt | Eukaryotic translation initiation factor 4 OS-Saccharomyces cerevisiae (strain ATCC 20458 / S288c) (GN:TEF4 PE1:1 SV:1)                        | qf912522                   | 24847.4  | 7  | 7                         | 0  | 0 | 1  |
| wt | Inorganic phosphate transport protein PRD08 OS-Saccharomyces cerevisiae (strain ATCC 20458 / S288c) (GN:PRD08 PE1:1 SV:1)                      | qf932854                   | 21138    | 26 | 26                        | 0  | 0 | 4  |
| wt | GTP-binding nuclear protein GSP1/CNT1 OS-Saccharomyces cerevisiae (strain ATCC 20458 / S288c) (GN:GSP1 PE1:1 SV:1)                             | qf938255                   | 24810.6  | 22 | 22                        | 0  | 0 | 6  |
| wt | Eukaryotic translation initiation factor 2a OS-Saccharomyces cerevisiae (strain ATCC 20458 / S288c) (GN:EIF2A PE1:1 SV:1)                      | qf932325                   | 31391.2  | 1  | 1                         | 0  | 0 | 1  |
| wt | Eukaryotic initiation factor 4b subunit 150 OS-Saccharomyces cerevisiae (strain ATCC 20458 / S288c) (GN:ITF4B1 PE1:1 SV:2)                     | qf939935                   | 101703.8 | 37 | 37                        | 0  | 0 | 27 |
| wt | Protein SCN1 OS-Saccharomyces cerevisiae (strain ATCC 20458 / S288c) (GN:SCN1 PE1:1 SV:1)                                                      | qf939773                   | 39199.2  | 7  | 7                         | 0  | 0 | 2  |
| wt | TRP complex subunit TRP2 OS-Saccharomyces cerevisiae (strain ATCC 20458 / S288c) (GN:TRP2 PE1:1 SV:1)                                          | qf915339                   | 30366.7  | 1  | 1                         | 0  | 0 | 4  |
| wt | N-terminal acetyltransferase A complex subunit NAM1 OS-Saccharomyces cerevisiae (strain ATCC 20458 / S288c) (GN:NAM1 PE1:1 SV:2)               | qf912445                   | 98912    | 1  | 1                         | 0  | 0 | 1  |
| wt | Nucleic acid-protein-associated complex subunit beta1 OS-Saccharomyces cerevisiae (strain YJM709) (GN:EDJ1 PE1:1 SV:1)                         | qf94ZWL1 qf90Q242          | 17020.5  | 24 | 24                        | 0  | 0 | 2  |
| wt | ARE1-binding factor 2, mitochondrial OS-Saccharomyces cerevisiae (strain ATCC 20458 / S288c) (GN:ARB2 PE1:1 SV:1)                              | qf902466                   | 21563.3  | 23 | 23                        | 0  | 0 | 4  |
| wt | Putative ribosomal RNA methyltransferase Nsp2 OS-Saccharomyces cerevisiae (strain ATCC 20458 / S288c) (GN:NOR2 PE1:1 SV:1)                     | qf940991                   | 69813.3  | 5  | 5                         | 0  | 0 | 5  |
| wt | SWI5-dependent HD expression protein 2 OS-Saccharomyces cerevisiae (strain YJM709) (GN:SHZ2 PE1:1 SV:1)                                        | qf94ZZW1 qf9BLQW9 qf9H5VM3 | 28268.8  | 4  | 4                         | 0  | 0 | 1  |
| wt | Glucoamylase-fructosyl transferase and/or amylase [alpha-amylase] OS-Saccharomyces cerevisiae (strain ATCC 20458 / S288c) (GN:GFA1 PE1:1 SV:1) | qf906106                   | 101123   | 7  | 7                         | 0  | 0 | 1  |
| wt | 60S ribosomal protein L9-B OS-Saccharomyces cerevisiae (strain ATCC 20458 / S288c) (GN:RPL9B PE1:1 SV:1)                                       | qf951481                   | 21657    | 30 | 30                        | 0  | 0 | 5  |
| wt | U2 small nuclear ribonucleoprotein B' OS-Saccharomyces cerevisiae (strain ATCC 20458 / S288c) (GN:MSL1 PE1:1 SV:1)                             | qf942657                   | 12830.3  | 24 | 24                        | 0  | 0 | 2  |
| wt | Hsc70-like OS-Saccharomyces cerevisiae (strain ATCC 20458 / S288c) (GN:HSC70 PE1:1 SV:1)                                                       | qf908697                   | 53944.7  | 0  | 0                         | 1  | 0 | 3  |
| wt | Transcription initiation factor TFIID subunit 12 OS-Saccharomyces cerevisiae (strain ATCC 20458 / S288c) (GN:TAI12 PE1:1 SV:1)                 | qf903761                   | 61072.1  | 5  | 5                         | 0  | 0 | 5  |
| wt | Peroxisomal TSA1 OS-Saccharomyces cerevisiae (strain ATCC 20458 / S288c) (GN:TSA1 PE1:1 SV:3)                                                  | qf947400                   | 25996.1  | 10 | 10                        | 0  | 0 | 9  |
| wt | Hsc83-like OS-Saccharomyces cerevisiae (strain ATCC 20458 / S288c) (GN:HSC83 PE1:1 SV:1)                                                       | qf902094 qf9CJZ57          | 19720    | 40 | 40                        | 0  | 0 | 11 |
| wt | Elongation factor 1-alpha OS-Saccharomyces cerevisiae (strain ATCC 20458 / S288c) (GN:TEF1 PE1:1 SV:1)                                         | qf902094                   | 20162.2  | 50 | 50                        | 0  | 0 | 19 |
| wt | Eukaryotic peptide chain release factor GTP-binding subunit OS-Saccharomyces cerevisiae (strain ATCC 20458 / S288c) (GN:RUP1 PE1:1 SV:1)       | qf905453                   | 76559.7  | 7  | 7                         | 0  | 0 | 4  |
| wt | Cytoskeletal-3-phosphatase dehydrogenase 2 OS-Saccharomyces cerevisiae (strain ATCC 20458 / S288c) (GN:CK2 PE1:1 SV:1)                         | qf905058                   | 55849.9  | 61 | 61                        | 0  | 0 | 18 |
| wt | Chromatin structure-remodeling complex subunit RSC9 OS-Saccharomyces cerevisiae (strain ATCC 20458 / S288c) (GN:RSC9 PE1:1 SV:1)               | qf901234                   | 63252.5  | 42 | 42                        | 0  | 0 | 11 |
| wt | Vascular protein sorting-associated protein 1 OS-Saccharomyces cerevisiae (strain ATCC 20458 / S288c) (GN:VPS1 PE1:1 SV:2)                     | qf921576                   | 78740    | 4  | 4                         | 0  | 0 | 23 |
| wt | Hsp90 class B OS-Saccharomyces cerevisiae (strain ATCC 20458 / S288c) (GN:HIT2 PE1:1 SV:1)                                                     | qf910022                   | 142833.6 | 1  | 1                         | 0  | 0 | 1  |
| wt | Protonome component C1 OS-Saccharomyces cerevisiae (strain ATCC 20458 / S288c) (GN:PRE1 PE1:1 SV:1)                                            | qf921242                   | 31538.4  | 4  | 4                         | 0  | 0 | 1  |
| wt | 60S ribosomal protein L14-B OS-Saccharomyces cerevisiae (strain ATCC 20458 / S288c) (GN:RPL14B PE1:1 SV:1)                                     | qf937454                   | 31532.2  | 37 | 37                        | 0  | 0 | 11 |
| wt | Translation machinery-associated protein 20 OS-Saccharomyces cerevisiae (strain ATCC 20458 / S288c) (GN:TMA20 PE1:1 SV:1)                      | qf908856                   | 20673.3  | 7  | 7                         | 0  | 0 | 1  |
| wt | 40S ribosomal protein S11 OS-Saccharomyces cerevisiae (strain ATCC 20458 / S288c) (GN:RPS11 PE1:1 SV:1)                                        | qf930874                   | 17029.8  | 1  | 1                         | 0  | 0 | 1  |
| wt | Partitoning protein RFP1 OS-Saccharomyces cerevisiae (strain ATCC 20458 / S288c) (GN:RFP1 PE1:1 SV:1)                                          | qf903761                   | 43211.6  | 3  | 3                         | 0  | 0 | 1  |
| wt | Spermidine synthase OS-Saccharomyces cerevisiae (strain ATCC 20458 / S288c) (GN:SPS1 PE1:1 SV:1)                                               | qf921074                   | 33322.4  | 4  | 4                         | 0  | 0 | 1  |
| wt | Eukaryotic protein 24B OS-Saccharomyces cerevisiae (strain ATCC 20458 / S288c) (GN:Y24B PE1:1 SV:1)                                            | qf912883                   | 23312.7  | 1  | 1                         | 0  | 0 | 2  |
| wt | Gluco-6-phosphate 1-epimerase OS-Saccharomyces cerevisiae (strain ATCC 20458 / S288c) (GN:YMR99C PE1:1 SV:1)                                   | qf903161                   | 139564.4 | 11 | 11                        | 0  | 0 | 2  |
| wt | Bud emergence protein 1 OS-Saccharomyces cerevisiae (strain ATCC 20458 / S288c) (GN:BEM1 PE1:1 SV:1)                                           | qf927566                   | 41697.6  | 2  | 2                         | 0  | 0 | 1  |
| wt | 40S ribosomal protein S2a OS-Saccharomyces cerevisiae (strain ATCC 20458 / S288c) (GN:RPS2A PE1:1 SV:1)                                        | qf97993 qf979939           | 15860    | 20 | 20                        | 0  | 0 | 2  |
| wt | Protein disulfide-isomerase MPO1 OS-Saccharomyces cerevisiae (strain ATCC 20458 / S288c) (GN:MPO1 PE1:1 SV:1)                                  | qf921450                   | 34463.3  | 1  | 1                         | 0  | 0 | 2  |
| wt | Nuclear protein STH1 NPS1 OS-Saccharomyces cerevisiae (strain ATCC 20458 / S288c) (GN:STH1 PE                                                  |                            |          |    |                           |    |   |    |

**Supplementary Table S5: Identification table referring to Figure 2b**

| sample name | Protein name | Protein accession numbers | Protein molecular weight (Da) | Percentage sequence coverage | Peptide sequence                                                                                                                                         | Total number of peptide | Number of shared peptide | Number of discriminant peptide |
|-------------|--------------|---------------------------|-------------------------------|------------------------------|----------------------------------------------------------------------------------------------------------------------------------------------------------|-------------------------|--------------------------|--------------------------------|
| WT          | PRP42        | sp Q03776                 | 65131,7                       | 15%                          | IDDIMDLK-IDINYSGR-ILEIPLHSFSK-KSGQEILLNNLVQFYSK-SLAYWEK-SLLLWTSYLK-STEPQLLK-TFcQNSLYSSR                                                                  | 8                       | 0                        | 8                              |
| WT          | PRP42        | sp Q03776                 | 65131,7                       | 19%                          | FcNNVISHQK-GLQAFNQR-IDDIMDLK-IDINYSGR-ILEIPLHSFSK-LIYFDTSR-NVLLMGLK-QLSQTSKDELLK-SLLLWTSYLK-SYLDKR-TFcQNSLYSSR                                           | 11                      | 0                        | 11                             |
| WT          | PRP42        | sp Q03776                 | 65131,7                       | 17%                          | GLQAFNQR-IDDIMDLK-IDINYSGR-ILEIPLHSFSK-LIYFDTSR-QLSQTSKDELLK-SLLLWTSYLK-STEPQLLK-SYLDKR-TFcQNSLYSSR                                                      | 10                      | 0                        | 10                             |
| WT          | PRP39        | sp P39682                 | 74734,2                       | 22%                          | ANTFLPLDFK-FATIEYQLFGLK-FVTDPSK-GLDTQFLQDNTALVQAYR-IKQPFNLGQVLNDDLENWSR-ILETSITNYINNQIDAK-INDLYTEEFLKEGK-IYEYIIEVPLHQYAR-SIAVLATSVK-SNNTLFNNIFNETVSR     | 10                      | 0                        | 10                             |
| WT          | PRP39        | sp P39682                 | 74734,2                       | 18%                          | ANTFLPLDFK-GLDTQFLQDNTALVQAYR-INDLYTEEFLKEGK-IYEYIIEVPLHQYAR-PDETNTIEDIEPRPDALR-SIAVLATSVK-SNNTLFNNIFNETVSR-YGNPNDSIK                                    | 8                       | 0                        | 8                              |
| WT          | PRP39        | sp P39682                 | 74734,2                       | 22%                          | ANTFLPLDFK-FATIEYQLFGLK-FVTDPSK-GLDTQFLQDNTALVQAYR-IKQPFNLGQVLNDDLENWSR-ILETSITNYINNQIDAK-INDLYTEEFLKEGK-IYEYIIEVPLHQYAR-SIAVLATSVK-SNNTLFNNIFNETVSR     | 10                      | 0                        | 10                             |
| WT          | LUC7         | sp Q07508                 | 30177,1                       | 19%                          | IQQVTEELDVLDVR-LQELISK-NITENVGQSAQQK-TFPEFEREYLAILSR                                                                                                     | 4                       | 0                        | 4                              |
| WT          | LUC7         | sp Q07508                 | 30177,1                       | 19%                          | IQQVTEELDVLDVR-NITENVGQSAQQK-TATTLPGR-TFPEFEREYLAILSR                                                                                                    | 4                       | 0                        | 4                              |
| WT          | LUC7         | sp Q07508                 | 30177,1                       | 22%                          | IQQVTEELDVLDVR-LQELISK-NITENVGQSAQQK-TATTLPGR-TFPEFEREYLAILSR                                                                                            | 5                       | 0                        | 5                              |
| WT          | MUD1         | sp P32605                 | 34361,8                       | 43%                          | GNDETYNLDIKK-IVKEFETR-KVEEAEIDR-LQNNDVTIGFAK-MTNQAFLTFVTQEEADRFLEK-NLAFVEYETVADATK-NQLGSTYK-sALYFQNLPSRPANKENYTR-YAINPSLPLPHNK-YTTTALK-YTTTALKVQGR       | 11                      | 0                        | 11                             |
| WT          | MUD1         | sp P32605                 | 34361,8                       | 33%                          | IVKEFETR-LQNNDVTIGFAK-MTNQAFLTFVTQEEADRFLEK-NLAFVEYETVADATK-NQLGSTYK-sALYFQNLPSRPANK-sALYFQNLPSRPANKENYTR-YAINPSLPLPHNK                                  | 8                       | 0                        | 8                              |
| WT          | MUD1         | sp P32605                 | 34361,8                       | 44%                          | IVKEFETR-KVEEAEIDR-LQNNDVTIGFAK-MTNQAFLTFVTQEEADRFLEK-NLAFVEYETVADATK-NQLGSTYK-sALYFQNLPSRPANKENYTR-TNSLLGLSIE <sub>m</sub> QK-YAINPSLPLPHNK-YTTTALKVQGR | 10                      | 0                        | 10                             |
| WT          | NAM8         | sp Q00539                 | 56954,5                       | 6%                           | SSSSLNENVDSR-VGPTSGQQQHVS <sub>G</sub> GNNDYNR                                                                                                           | 2                       | 0                        | 2                              |
| WT          | NAM8         | sp Q00539                 | 56954,5                       | 8%                           | QTTYPSR-SSSSLNENVDSR-VGPTSGQQQHVS <sub>G</sub> GNNDYNR                                                                                                   | 3                       | 0                        | 3                              |
| WT          | NAM8         | sp Q00539                 | 56954,5                       | 6%                           | SSSSLNENVDSR-VGPTSGQQQHVS <sub>G</sub> GNNDYNR                                                                                                           | 2                       | 0                        | 2                              |

|    |       |              |          |     |                                                                                                                                                                                                 |    |   |    |
|----|-------|--------------|----------|-----|-------------------------------------------------------------------------------------------------------------------------------------------------------------------------------------------------|----|---|----|
| WT | SNU56 | sp Q03782    | 56482,3  | 11% | GQLSQGHYPPTSNDGQR-HAVNKPSNVLNSSNR-QNYIDIVYQNLNDR-TRPIIETSK                                                                                                                                      | 4  | 0 | 4  |
| WT | SNU56 | sp Q03782    | 56482,3  | 5%  | GQLSQGHYPPTSNDGQR-GSLILPMR                                                                                                                                                                      | 2  | 0 | 2  |
| WT | SNU56 | sp Q03782    | 56482,3  | 9%  | GQLSQGHYPPTSNDGQR-HAVNKPSNVLNSSNR-NINLTGSFYLPK                                                                                                                                                  | 3  | 0 | 3  |
| WT | SNU71 | sp A6ZV04,sp | 71381,2  | 25% | AAAITLPEGTVK-ADIMSAENYEEHLEKNR-ASEFYSVFK-ELAPIQLSDGK-FSKVDEDEAFVNTLNYcK-NIEDQTDER-QALLNELRETFDEDGETIADR-SAAEDRLPFTADELNIR-SEYNADKNVSESEHVK-SGFIPILK-TGTIPSVKPEK-VFDQIR                          | 12 | 0 | 12 |
| WT | SNU71 | sp A6ZV04,sp | 71381,2  | 27% | AAAITLPEGTVK-ADIMSAENYEEHLEK-ADIMSAENYEEHLEKNR-ASEFYSVFK-ELAPIQLSDGK-EYVEDR-FSKVDEDEAFVNTLNYcK-NIEDQTDER-QFLPISLDQQIHVSLQGVSSFSR-SAAEDRLPFTADELNIR-SEYNADKNVSESEHVK-SGFIPILK-TGTIPSVKPEK-VFDQIR | 14 | 0 | 14 |
| WT | SNU71 | sp A6ZV04,sp | 71381,2  | 20% | ALFAFIR-ASEFYSVFK-ELAPIQLSDGK-NIEDQTDER-QFLPISLDQQIHVSLQGVSSFSR-SAAEDRLPFTADELNIR-SEYNADKNVSESEHVK-SGFIPILK-TGTIPSVKPEK-VFDQIR-VFDQIRK                                                          | 11 | 0 | 11 |
| WT | YHC1  | sp Q05900    | 27027,8  | 15% | ELAQTSIDTLK-LLYDGSPGYSK-SRDETCESNPFPR                                                                                                                                                           | 3  | 0 | 3  |
| WT | YHC1  | sp Q05900    | 27027,8  | 10% | ELAQTSIDTLK-LLYDGSPGYSK                                                                                                                                                                         | 2  | 0 | 2  |
| WT | YHC1  | sp Q05900    | 27027,8  | 5%  | ELAQTSIDTLK                                                                                                                                                                                     | 1  | 0 | 1  |
| WT | LEA1  | sp Q08963    | 27176,2  | 30% | DLQLETDSSEMPSSLK-LVPHLETLDQFNVTAEER-NNIVEVDGR-QADGDTLGPVNTAIR-QLAEATSLEEIAR                                                                                                                     | 5  | 0 | 5  |
| WT | LEA1  | sp Q08963    | 27176,2  | 30% | DLQLETDSSEMPSSLK-LVPHLETLDQFNVTAEER-NNIVEVDGR-QADGDTLGPVNTAIR-QLAEATSLEEIAR                                                                                                                     | 5  | 0 | 5  |
| WT | LEA1  | sp Q08963    | 27176,2  | 30% | DLQLETDSSEMPSSLK-LVPHLETLDQFNVTAEER-NNIVEVDGR-QADGDTLGPVNTAIR-QLAEATSLEEIAR                                                                                                                     | 5  | 0 | 5  |
| WT | PRP9  | sp P19736    | 63014,6  | 3%  | DLDLNEIFTR-SSLIAENK                                                                                                                                                                             | 2  | 0 | 2  |
| WT | PRP9  | sp P19736    | 63014,6  | 3%  | TNILSDR-VFPDTKLPR                                                                                                                                                                               | 2  | 0 | 2  |
| WT | PRP9  | sp P19736    | 63014,6  | 5%  | DLDLNEIFTR-SSLIAENK-TNILSDR                                                                                                                                                                     | 3  | 0 | 3  |
| WT | PRP21 | sp P32524    | 33035,8  | 14% | EIARPPDFLFSQYDTGISR-TILDNcFER-VYSFTGQEIKK                                                                                                                                                       | 3  | 0 | 3  |
| WT | PRP21 | sp P32524    | 33035,8  | 16% | EIARPPDFLFSQYDTGISR-IQFAAIPWDKFTQVAK-TILDNcFER                                                                                                                                                  | 3  | 0 | 3  |
| WT | PRP21 | sp P32524    | 33035,8  | 7%  | EIARPPDFLFSQYDTGISR                                                                                                                                                                             | 1  | 0 | 1  |
| WT | RSE1  | sp Q04693    | 153772,1 | 3%  | SQIVSDSPLSIATK-SVQVEDIIQTINEVR-SVTQTPVSITK                                                                                                                                                      | 3  | 0 | 3  |
| WT | RSE1  | sp Q04693    | 153772,1 | 2%  | SQIVSDSPLSIATK-SVTQTPVSITK                                                                                                                                                                      | 2  | 0 | 2  |
| WT | RSE1  | sp Q04693    | 153772,1 | 4%  | LSLNEQEFLAK-SQIVSDSPLSIATK-SVQVEDIIQTINEVR-TLVNQPLTR                                                                                                                                            | 4  | 0 | 4  |
| WT | PRP11 | sp Q07350    | 29903,2  | 14% | GENVPYTFQDEKDDQVR-IVSGLELSDTKQK-VPPLIR                                                                                                                                                          | 3  | 0 | 3  |

|                |       |              |          |     |                                                                                             |   |   |   |
|----------------|-------|--------------|----------|-----|---------------------------------------------------------------------------------------------|---|---|---|
| WT             | PRP11 | sp Q07350    | 29903,2  | 20% | GENVPYTFQDEKDDQVR-IVSGLELSDTK-IVSGLELSDTKQK-KGGGGIASESQFNLQR-VPPLIR                         | 5 | 0 | 5 |
| WT             | PRP11 | sp Q07350    | 29903,2  | 7%  | IVSGLELSDTK-IVSGLELSDTKQK-VPPLIR                                                            | 3 | 0 | 3 |
| <i>htb1K12</i> | PRP42 | sp Q03776    | 65131,7  | 1%  | LIYFDTSR                                                                                    | 1 | 0 | 1 |
| <i>htb1K12</i> | PRP42 | sp Q03776    | 65131,7  | 1%  | LIYFDTSR                                                                                    | 1 | 0 | 1 |
| <i>htb1K12</i> | PRP42 | sp Q03776    | 65131,7  | 1%  | LIYFDTSR                                                                                    | 1 | 0 | 1 |
| <i>htb1K12</i> | PRP39 | sp P39682    | 74734,2  | 7%  | ANTFLPLDFK-IKQPFFNLGQVLNDDLENWSR-IYEYIIIEVPLHQYAR                                           | 3 | 0 | 3 |
| <i>htb1K12</i> | PRP39 | sp P39682    | 74734,2  | 6%  | ANTFLPLDFK-IYEYIIIEVPLHQYAR-SIAVLATSVK                                                      | 3 | 0 | 3 |
| <i>htb1K12</i> | PRP39 | sp P39682    | 74734,2  | 7%  | ANTFLPLDFK-IKQPFFNLGQVLNDDLENWSR-IYEYIIIEVPLHQYAR                                           | 3 | 0 | 3 |
| <i>htb1K12</i> | LUC7  | sp Q07508    | 30177,1  | 3%  | LQELISK                                                                                     | 1 | 0 | 1 |
| <i>htb1K12</i> | LUC7  | sp Q07508    | 30177,1  | 8%  | LQELISK-NITENVGQSAQQK                                                                       | 2 | 0 | 2 |
| <i>htb1K12</i> | LUC7  | sp Q07508    | 30177,1  | 8%  | IQQVTEELDVLDVR-LQELISK                                                                      | 2 | 0 | 2 |
| <i>htb1K12</i> | MUD1  | sp P32605    | 34361,8  | 11% | LQNNDVTIGFAK-sALYFQNLPSRPANKENYTR                                                           | 2 | 0 | 2 |
| <i>htb1K12</i> | MUD1  | sp P32605    | 34361,8  | 8%  | LQNNDVTIGFAK-YAINPSLPLPHNK                                                                  | 2 | 0 | 2 |
| <i>htb1K12</i> | MUD1  | sp P32605    | 34361,8  | 8%  | LQNNDVTIGFAK-YAINPSLPLPHNK                                                                  | 2 | 0 | 2 |
| <i>htb1K12</i> | NAM8  | sp Q00539    | 56954,5  | 4%  | VGPTSGQQQHVSIGNNDYNR                                                                        | 1 | 0 | 1 |
| <i>htb1K12</i> | NAM8  | sp Q00539    | 56954,5  | 4%  | VGPTSGQQQHVSIGNNDYNR                                                                        | 1 | 0 | 1 |
| <i>htb1K12</i> | SNU56 | sp Q03782    | 56482,3  | 7%  | GQLSQGHYPTTSNDGQR-HAVNKPSNVLNSSNR                                                           | 2 | 0 | 2 |
| <i>htb1K12</i> | SNU56 | sp Q03782    | 56482,3  | 3%  | GQLSQGHYPTTSNDGQR                                                                           | 1 | 0 | 1 |
| <i>htb1K12</i> | SNU71 | sp A6ZV04,sp | 71381,2  | 10% | AAAITLPEGTVK-ASEFYSVFK-ELAPIQLSDGK-SAAEDRLPFTADELNIR-TGTIPSVKPEK                            | 5 | 0 | 5 |
| <i>htb1K12</i> | SNU71 | sp A6ZV04,sp | 71381,2  | 14% | AAAITLPEGTVK-ASEFYSVFK-ELAPIQLSDGK-NIEDQTDER-SAAEDRLPFTADELNIR-SENYNADKNVSESESEHVK-SGFIPILK | 7 | 0 | 7 |
| <i>htb1K12</i> | SNU71 | sp A6ZV04,sp | 71381,2  | 13% | AAAITLPEGTVK-ADIMSAENYEEHLEK-ELAPIQLSDGK-NIEDQTDER-SAAEDRLPFTADELNIR-SGFIPILK-TGTIPSVKPEK   | 7 | 0 | 7 |
| <i>htb1K12</i> | YHC1  | sp Q05900    | 27027,8  | 5%  | ELAQTSIDTLK                                                                                 | 1 | 0 | 1 |
| <i>htb1K12</i> | YHC1  | sp Q05900    | 27027,8  | 5%  | ELAQTSIDTLK                                                                                 | 1 | 0 | 1 |
| <i>htb1K12</i> | YHC1  | sp Q05900    | 27027,8  | 5%  | ELAQTSIDTLK                                                                                 | 1 | 0 | 1 |
| <i>htb1K12</i> | PRP21 | sp P32524    | 33035,8  | 3%  | TILDNcFER                                                                                   | 1 | 0 | 1 |
| <i>htb1K12</i> | RSE1  | sp Q04693    | 153772,1 | 1%  | LSLNEQEFLAK                                                                                 | 1 | 0 | 1 |
| <i>htb1K12</i> | RSE1  | sp Q04693    | 153772,1 | 1%  | SVQVEDIIQTINEVR                                                                             | 1 | 0 | 1 |

**Supplementary Table S6: Complete spectral count table referring to Figure 2b**

| Identified Proteins | Accession Number | Molecular Weight | NO TAG                         | NO TAG                         | NO TAG                         | WT                             | WT                             | WT                             | <i>htb1K123R</i>               | <i>htb1K123R</i>               | <i>htb1K123R</i>               |
|---------------------|------------------|------------------|--------------------------------|--------------------------------|--------------------------------|--------------------------------|--------------------------------|--------------------------------|--------------------------------|--------------------------------|--------------------------------|
|                     |                  |                  | Injection 1 number of spectrum | Injection 2 number of spectrum | Injection 3 number of spectrum | Injection 1 number of spectrum | Injection 2 number of spectrum | Injection 3 number of spectrum | Injection 1 number of spectrum | Injection 2 number of spectrum | Injection 3 number of spectrum |
| STO1                | sp P34160        | 100 kDa          | 7                              | 3                              | 4                              | 429                            | 429                            | 429                            | 429                            | 429                            | 429                            |
| CBC2                | sp Q08920        | 24 kDa           | 7                              | 3                              | 4                              | 152                            | 127                            | 142                            | 157                            | 155                            | 159                            |
| PRP42               | sp Q03776        | 65 kDa           | 0                              | 0                              | 0                              | 11                             | 9                              | 14                             | 2                              | 2                              | 2                              |
| PRP39               | sp P39682        | 75 kDa           | 0                              | 0                              | 0                              | 9                              | 13                             | 15                             | 5                              | 5                              | 5                              |
| LUC7                | sp Q07508        | 30 kDa           | 0                              | 0                              | 0                              | 4                              | 5                              | 7                              | 2                              | 5                              | 3                              |
| MUD1                | sp P32605        | 34 kDa           | 0                              | 0                              | 0                              | 10                             | 14                             | 15                             | 3                              | 3                              | 5                              |
| NAM8                | sp Q00539        | 57 kDa           | 0                              | 0                              | 0                              | 3                              | 3                              | 3                              | 2                              | 0                              | 2                              |
| SNU56               | sp Q03782        | 57 kDa           | 0                              | 0                              | 0                              | 3                              | 6                              | 5                              | 3                              | 0                              | 2                              |
| SNU71               | sp A6ZV04 (+     | 71 kDa           | 0                              | 0                              | 0                              | 16                             | 16                             | 13                             | 9                              | 11                             | 11                             |
| YHC1                | sp Q05900        | 27 kDa           | 0                              | 0                              | 0                              | 3                              | 4                              | 2                              | 2                              | 2                              | 2                              |
| LEA1                | sp Q08963        | 27 kDa           | 0                              | 0                              | 0                              | 5                              | 5                              | 6                              | 0                              | 0                              | 0                              |
| PRP9                | sp P19736        | 63 kDa           | 0                              | 0                              | 0                              | 2                              | 2                              | 3                              | 0                              | 0                              | 0                              |
| PRP21               | sp P32524        | 33 kDa           | 0                              | 0                              | 0                              | 3                              | 3                              | 1                              | 2                              | 0                              | 0                              |
| RSE1                | sp Q04693        | 154 kDa          | 0                              | 0                              | 0                              | 3                              | 3                              | 6                              | 2                              | 0                              | 2                              |
| PRP11               | sp Q07350        | 30 kDa           | 0                              | 0                              | 0                              | 5                              | 3                              | 3                              | 0                              | 0                              | 0                              |
